# Supplementary material
Source: PubMed Central journal article supplement (PMC9085976)

Supplementary Table 1 Characteristics and psychiatric comorbidity of cases and controls in NESARC-III EA.

| Characteristic                                                   | Categories           | AUD<br>(4,487) | NUD<br>(4,394) | CUD<br>(954) | NMPOUD<br>(346) | Any SUD<br>(6,525) | Controls<br>(3,959) |
|------------------------------------------------------------------|----------------------|----------------|----------------|--------------|-----------------|--------------------|---------------------|
| Sex                                                              | Men                  | 54.5%          | 50.2%          | 61.2%        | 50.6%           | 51.2%              | 40.7%               |
|                                                                  | Women                | 45.5%          | 49.8%          | 38.8%        | 49.4%           | 48.8%              | 59.3%               |
| Age                                                              | 18-29                | 24.7%          | 19.2%          | 31.1%        | 26.0%           | 21.6%              | 14.9%               |
|                                                                  | 30-44                | 30.5%          | 26.9%          | 34.1%        | 34.4%           | 27.8%              | 19.5%               |
|                                                                  | 45-64                | 35.5%          | 38.9%          | 32.1%        | 34.4%           | 37.4%              | 31.2%               |
|                                                                  | 65+                  | 9.4%           | 15.1%          | 2.7%         | 5.2%            | 13.1%              | 34.5%               |
| Marital status                                                   | Married/cohabitating | 47.9%          | 46.2%          | 42.7%        | 40.5%           | 48.2%              | 57.5%               |
|                                                                  | Previously married   | 25.5%          | 32.6%          | 22.2%        | 30.9%           | 28.4%              | 26.9%               |
|                                                                  | Never married        | 26.7%          | 21.2%          | 35.1%        | 28.6%           | 23.4%              | 15.6%               |
| Education                                                        | < high school        | 7.5%           | 13.2%          | 8.7%         | 18.8%           | 9.9%               | 7.6%                |
|                                                                  | High school          | 22.7%          | 29.2%          | 26.4%        | 27.5%           | 25.2%              | 23.8%               |
|                                                                  | Some college         | 69.8%          | 57.6%          | 64.9%        | 53.8%           | 64.9%              | 68.6%               |
| Income                                                           | \$0-\$19,999         | 23.4%          | 29.5%          | 29.9%        | 41.9%           | 25.5%              | 19.0%               |
|                                                                  | \$20,000-\$34,999    | 19.5%          | 22.1%          | 20.7%        | 19.7%           | 20.5%              | 17.4%               |
|                                                                  | \$35,000-\$69,999    | 28.3%          | 27.8%          | 29.4%        | 23.4%           | 28.0%              | 28.8%               |
|                                                                  | \$70,000 or more     | 28.8%          | 20.6%          | 20.1%        | 15.0%           | 26.0%              | 34.8%               |
| Urbanicity                                                       | Urban                | 78.0%          | 72.3%          | 80.0%        | 75.1%           | 75.7%              | 72.8%               |
|                                                                  | Rural                | 22.0%          | 27.7%          | 20.0%        | 24.9%           | 24.3%              | 27.3%               |
| Any mood disorder                                                | Yes                  | 41.5%          | 39.7%          | 54.0%        | 58.7%           | 38.7%              | NA                  |
|                                                                  | No                   | 58.6%          | 60.3%          | 46.0%        | 41.3%           | 61.3%              | NA                  |
| Any anxiety disorder                                             | Yes                  | 29.3%          | 29.8%          | 36.0%        | 46.2%           | 27.9%              | NA                  |
|                                                                  | No                   | 70.7%          | 70.3%          | 64.1%        | 53.8%           | 72.1%              | NA                  |
| Posttraumatic stress disorder                                    | Yes                  | 11.8%          | 12.8%          | 16.5%        | 27.5%           | 11.1%              | NA                  |
|                                                                  | No                   | 88.2%          | 87.2%          | 83.5%        | 72.5%           | 88.9%              | NA                  |
| Personality disorder<br>(Antisocial, Borderline,<br>Schizotypal) | Yes                  | 30.6%          | 30.4%          | 46.4%        | 58.4%           | 27.3%              | NA                  |
|                                                                  | No                   | 69.4%          | 69.6%          | 53.6%        | 41.6%           | 72.7%              | NA                  |

Supplementary Table 2 Evidence for association in NESARC-III of previously robustly replicated genes for SUD (all substances) in EA (P<0.05).

| Disorder | Gene     | SNP        | Function      | Chr | Pos       | REF | ALT | N     | AF <sup>a</sup> | EFFECT <sup>b</sup> | SE   | Pvalue   |
|----------|----------|------------|---------------|-----|-----------|-----|-----|-------|-----------------|---------------------|------|----------|
| AUD      | ADH1B    | rs1229984  | Nonsynonymous | 4   | 100239319 | T   | C   | 8446  | 0.964           | 0.31                | 0.09 | 7.98E-04 |
| AUD      | OPRM1    | rs34427887 | Stop Gain     | 6   | 154567863 | C   | T   | 8446  | 0.068           | 0.21                | 0.07 | 1.83E-03 |
| AUD      | ALDH16A1 | rs11558188 | Synonymous    | 19  | 49967981  | T   | G   | 8446  | 0.348           | 0.09                | 0.03 | 7.39E-03 |
| AUD      | OPRM1    | rs712242   | Intron        | 6   | 154333172 | T   | C   | 8446  | 0.474           | 0.08                | 0.03 | 1.85E-02 |
| AUD      | OPRM1    | rs1294092  | Intron        | 6   | 154335673 | A   | G   | 8446  | 0.160           | 0.09                | 0.04 | 4.06E-02 |
| AUD      | OPRM1    | rs2075572  | Intron        | 6   | 154412004 | G   | C   | 8446  | 0.567           | -0.07               | 0.03 | 4.76E-02 |
| NUD      | CHRNA3   | rs578776   | Utr3          | 15  | 78888400  | G   | A   | 8353  | 0.273           | -0.11               | 0.04 | 3.04E-03 |
| NUD      | CHRNA5   | rs569207   | Intron        | 15  | 78873119  | C   | T   | 8353  | 0.221           | -0.11               | 0.04 | 3.13E-03 |
| NUD      | CHRNA5   | rs667282   | Intron        | 15  | 78863472  | T   | C   | 8353  | 0.221           | -0.11               | 0.04 | 3.33E-03 |
| NUD      | CHRNA3   | rs6495308  | Intron        | 15  | 78907656  | T   | C   | 8353  | 0.222           | -0.11               | 0.04 | 4.00E-03 |
| NUD      | CHRNA3   | rs938682   | Intron        | 15  | 78896547  | G   | A   | 8353  | 0.776           | 0.11                | 0.04 | 4.24E-03 |
| NUD      | CHRNA3   | rs11637630 | Intron        | 15  | 78899719  | G   | A   | 8353  | 0.775           | 0.11                | 0.04 | 4.93E-03 |
| NUD      | CHRNA3   | rs3825845  | Intron        | 15  | 78910258  | C   | T   | 8353  | 0.217           | -0.11               | 0.04 | 4.98E-03 |
| NUD      | CHRNA3   | rs8042494  | Intron        | 15  | 78908010  | C   | T   | 8353  | 0.223           | -0.11               | 0.04 | 5.01E-03 |
| NUD      | CHRNA3   | rs28669908 | Intron        | 15  | 78910267  | C   | A   | 8353  | 0.203           | -0.11               | 0.04 | 5.53E-03 |
| NUD      | CHRNA5   | rs1700006  | Intron        | 15  | 78875623  | A   | G   | 8353  | 0.208           | -0.11               | 0.04 | 6.13E-03 |
| NUD      | CHRNA3   | rs12910984 | Intron        | 15  | 78891627  | G   | A   | 8353  | 0.776           | 0.10                | 0.04 | 6.29E-03 |
| NUD      | CHRNA5   | rs684513   | Intron        | 15  | 78858400  | C   | G   | 8353  | 0.203           | -0.10               | 0.04 | 8.58E-03 |
| NUD      | CHRNA3   | rs4887069  | Intron        | 15  | 78909070  | A   | G   | 8353  | 0.229           | -0.10               | 0.04 | 8.59E-03 |
| NUD      | CHRNA3   | rs7177514  | Intron        | 15  | 78907406  | C   | G   | 8353  | 0.225           | -0.10               | 0.04 | 1.01E-02 |
| NUD      | OPRM1    | rs34427887 | Stop Gain     | 6   | 154567863 | C   | T   | 8353  | 0.067           | 0.17                | 0.07 | 1.02E-02 |
| NUD      | ALDH16A1 | rs11558188 | Synonymous    | 19  | 49967981  | T   | G   | 8353  | 0.344           | 0.07                | 0.03 | 3.45E-02 |
| CUD      | COMT     | rs4646312  | Intron        | 22  | 19948337  | T   | C   | 4913  | 0.398           | -0.17               | 0.06 | 2.44E-03 |
| CUD      | COMT     | rs740601   | Intron        | 22  | 19950763  | T   | G   | 4913  | 0.402           | -0.17               | 0.06 | 2.92E-03 |
| CUD      | OPRM1    | rs9397688  | Intron        | 6   | 154466607 | C   | G   | 4913  | 0.126           | -0.21               | 0.08 | 1.28E-02 |
| CUD      | OPRM1    | rs34427887 | Stop Gain     | 6   | 154567863 | C   | T   | 4913  | 0.065           | 0.28                | 0.12 | 1.46E-02 |
| CUD      | ADH1B    | rs4147536  | Intron        | 4   | 100239112 | A   | C   | 4913  | 0.771           | 0.16                | 0.07 | 1.88E-02 |
| NMPOUD   | COMT     | rs737864   | Intron        | 22  | 19930159  | C   | T   | 4305  | 0.286           | 0.23                | 0.09 | 1.18E-02 |
| NMPOUD   | COMT     | rs174697   | Intron        | 22  | 19953832  | A   | G   | 4305  | 0.951           | 0.39                | 0.19 | 4.60E-02 |
| Any SUD  | OPRM1    | rs34427887 | Stop Gain     | 6   | 154567863 | C   | T   | 10484 | 0.069           | 0.19                | 0.06 | 1.58E-03 |
| Any SUD  | CHRNA3   | rs578776   | Utr3          | 15  | 78888400  | G   | A   | 10484 | 0.272           | -0.09               | 0.03 | 5.18E-03 |
| Any SUD  | ALDH16A1 | rs11558188 | Synonymous    | 19  | 49967981  | T   | G   | 10484 | 0.348           | 0.08                | 0.03 | 6.59E-03 |
| Any SUD  | ADH1B    | rs1229984  | Nonsynonymous | 4   | 100239319 | T   | C   | 10484 | 0.964           | 0.22                | 0.08 | 7.36E-03 |
| Any SUD  | CHRNA3   | rs938682   | Intron        | 15  | 78896547  | G   | A   | 10484 | 0.775           | 0.08                | 0.04 | 2.72E-02 |
| Any SUD  | CHRNA3   | rs6495308  | Intron        | 15  | 78907656  | T   | C   | 10484 | 0.223           | -0.08               | 0.04 | 2.82E-02 |
| Any SUD  | CHRNA5   | rs569207   | Intron        | 15  | 78873119  | C   | T   | 10484 | 0.222           | -0.08               | 0.04 | 2.85E-02 |
| Any SUD  | CHRNA5   | rs667282   | Intron        | 15  | 78863472  | T   | C   | 10484 | 0.222           | -0.08               | 0.04 | 3.02E-02 |
| Any SUD  | CHRNA3   | rs11637630 | Intron        | 15  | 78899719  | G   | A   | 10484 | 0.774           | 0.08                | 0.04 | 3.05E-02 |
| Any SUD  | CHRNA3   | rs660652   | Utr3          | 15  | 78887832  | A   | G   | 10484 | 0.621           | -0.07               | 0.03 | 3.26E-02 |

|         |        |            |                    |    |          |   |   |       |       |       |      |          |
|---------|--------|------------|--------------------|----|----------|---|---|-------|-------|-------|------|----------|
| Any SUD | CHRNA3 | rs2869546  | Intron             | 15 | 78907345 | C | T | 10484 | 0.614 | -0.06 | 0.03 | 3.34E-02 |
| Any SUD | CHRNA3 | rs8042494  | Intron             | 15 | 78908010 | C | T | 10484 | 0.224 | -0.08 | 0.04 | 3.39E-02 |
| Any SUD | CHRNA3 | rs12910984 | Intron             | 15 | 78891627 | G | A | 10484 | 0.775 | 0.07  | 0.04 | 3.74E-02 |
| Any SUD | CHRNA5 | rs11637635 | Intron             | 15 | 78877150 | A | G | 10484 | 0.619 | -0.06 | 0.03 | 3.74E-02 |
| Any SUD | CHRNA3 | rs62010327 | Intron             | 15 | 78892784 | G | A | 10484 | 0.380 | 0.06  | 0.03 | 4.14E-02 |
| Any SUD | CHRNA5 | rs1700006  | Intron             | 15 | 78875623 | A | G | 10484 | 0.209 | -0.07 | 0.04 | 4.28E-02 |
| Any SUD | COMT   | rs4646312  | Intron             | 22 | 19948337 | T | C | 10484 | 0.397 | -0.06 | 0.03 | 4.41E-02 |
| Any SUD | CHRNA5 | rs495090   | Intron             | 15 | 78870003 | A | G | 10484 | 0.614 | -0.06 | 0.03 | 4.46E-02 |
| Any SUD | CHRNA3 | rs3743074  | Normal_Splice_Site | 15 | 78909480 | G | A | 10484 | 0.620 | -0.06 | 0.03 | 4.47E-02 |
| Any SUD | CHRNA5 | rs495956   | Intron             | 15 | 78869930 | C | T | 10484 | 0.618 | -0.06 | 0.03 | 4.69E-02 |

<sup>a</sup> AF: Allele freq for ALT allele.

<sup>b</sup> Positive value indicates ALT allele is the risk allele.

Supplementary table 3 Evidence for association of previously robustly replicated genes for AUD in NESARC-III EA (P<0.05).

| Disorder | Gene   | SNP        | Function      | Chr | Pos       | REF | ALT | N    | AF <sup>a</sup> | EFFECT <sup>b</sup> | SE   | Pvalue   |
|----------|--------|------------|---------------|-----|-----------|-----|-----|------|-----------------|---------------------|------|----------|
| AUD      | GRIK1  | rs107034   | Intron        | 21  | 31266406  | C   | T   | 8446 | 0.958           | 0.29                | 0.08 | 4.86E-04 |
| AUD      | GRIK1  | rs466559   | Intron        | 21  | 31258083  | T   | G   | 8446 | 0.958           | 0.28                | 0.08 | 7.37E-04 |
| AUD      | GRIK1  | rs466612   | Intron        | 21  | 31264389  | T   | G   | 8446 | 0.959           | 0.28                | 0.08 | 7.69E-04 |
| AUD      | ADH1B  | rs1229984  | Nonsynonymous | 4   | 100239319 | T   | C   | 8446 | 0.964           | 0.31                | 0.09 | 7.98E-04 |
| AUD      | GRIN2B | rs2284404  | Intron        | 12  | 13804359  | A   | G   | 8446 | 0.382           | 0.11                | 0.03 | 1.11E-03 |
| AUD      | GRIN2B | rs1805479  | Intron        | 12  | 13753091  | C   | A   | 8446 | 0.368           | 0.11                | 0.03 | 1.19E-03 |
| AUD      | GRIN2B | rs1805485  | Intron        | 12  | 13766887  | C   | A   | 8446 | 0.378           | 0.11                | 0.03 | 1.28E-03 |
| AUD      | GRIN2B | rs12582333 | Intron        | 12  | 13767536  | C   | T   | 8446 | 0.378           | 0.11                | 0.03 | 1.46E-03 |
| AUD      | GRIN2B | rs4764023  | Intron        | 12  | 13794318  | A   | G   | 8446 | 0.378           | 0.11                | 0.03 | 1.55E-03 |
| AUD      | GRIN2B | rs10845819 | Intron        | 12  | 13805633  | G   | C   | 8446 | 0.377           | 0.11                | 0.03 | 1.63E-03 |
| AUD      | GRIN2B | rs10845811 | Intron        | 12  | 13759721  | A   | G   | 8446 | 0.379           | 0.11                | 0.03 | 1.73E-03 |
| AUD      | OPRM1  | rs34427887 | Stop Gain     | 6   | 154567863 | C   | T   | 8446 | 0.068           | 0.21                | 0.07 | 1.83E-03 |
| AUD      | GRIN2B | rs2268097  | Intron        | 12  | 13752832  | A   | G   | 8446 | 0.382           | 0.10                | 0.03 | 2.65E-03 |
| AUD      | GRIN2B | rs1805480  | Intron        | 12  | 13753778  | C   | T   | 8446 | 0.372           | 0.10                | 0.03 | 2.69E-03 |
| AUD      | GRIK1  | rs466093   | Intron        | 21  | 31267040  | A   | C   | 8446 | 0.957           | 0.24                | 0.08 | 2.76E-03 |
| AUD      | GRIN2B | rs2284402  | Intron        | 12  | 13775958  | G   | A   | 8446 | 0.616           | -0.10               | 0.03 | 2.87E-03 |
| AUD      | GRIN2B | rs2268100  | Intron        | 12  | 13792067  | T   | C   | 8446 | 0.389           | 0.10                | 0.03 | 3.89E-03 |
| AUD      | FAAH   | rs2295633  | Intron        | 1   | 46874383  | A   | G   | 8446 | 0.632           | -0.10               | 0.03 | 4.67E-03 |
| AUD      | GRIN2B | rs1805481  | Intron        | 12  | 13763455  | A   | C   | 8446 | 0.389           | 0.10                | 0.03 | 4.71E-03 |
| AUD      | GRIN2B | rs1805539  | Intron        | 12  | 13770190  | G   | C   | 8446 | 0.388           | 0.10                | 0.03 | 4.79E-03 |
| AUD      | GABRA2 | rs573400   | Utr3          | 4   | 46252066  | C   | T   | 8446 | 0.572           | 0.09                | 0.03 | 4.92E-03 |
| AUD      | GABRA2 | rs2350772  | Intron        | 4   | 46293351  | C   | T   | 8446 | 0.437           | -0.09               | 0.03 | 4.96E-03 |
| AUD      | GABRA2 | rs541418   | Intron        | 4   | 46253216  | C   | T   | 8446 | 0.572           | 0.09                | 0.03 | 5.07E-03 |
| AUD      | GABRA2 | rs279862   | Intron        | 4   | 46313309  | T   | G   | 8446 | 0.434           | -0.09               | 0.03 | 5.42E-03 |
| AUD      | FAAH   | rs3766246  | Intron        | 1   | 46865671  | A   | G   | 8446 | 0.623           | -0.09               | 0.03 | 5.44E-03 |
| AUD      | GSK3B  | rs17810676 | Intron        | 3   | 119780549 | T   | C   | 8446 | 0.384           | 0.09                | 0.03 | 5.67E-03 |
| AUD      | GABRA2 | rs481311   | Intron        | 4   | 46254382  | A   | T   | 8446 | 0.569           | 0.09                | 0.03 | 5.72E-03 |
| AUD      | GABRA2 | rs3113346  | Intron        | 4   | 46255176  | T   | G   | 8446 | 0.571           | 0.09                | 0.03 | 6.29E-03 |
| AUD      | FAAH   | rs4141964  | Intron        | 1   | 46865040  | T   | C   | 8446 | 0.625           | -0.09               | 0.03 | 6.38E-03 |
| AUD      | GABRA2 | rs12647055 | Intron        | 4   | 46355479  | T   | C   | 8446 | 0.532           | 0.09                | 0.03 | 6.38E-03 |
| AUD      | GRIN2B | rs2300239  | Intron        | 12  | 13815210  | C   | T   | 8446 | 0.422           | -0.09               | 0.03 | 6.78E-03 |
| AUD      | GRIN2B | rs10845814 | Intron        | 12  | 13772993  | T   | C   | 8446 | 0.430           | 0.09                | 0.03 | 6.78E-03 |
| AUD      | GABRA2 | rs548260   | Intron        | 4   | 46268484  | G   | A   | 8446 | 0.563           | 0.09                | 0.03 | 7.29E-03 |
| AUD      | GABRA2 | rs28753386 | Intron        | 4   | 46303800  | C   | A   | 8446 | 0.435           | -0.09               | 0.03 | 7.30E-03 |
| AUD      | GSK3B  | rs12630592 | Intron        | 3   | 119768246 | G   | T   | 8446 | 0.385           | 0.09                | 0.03 | 7.47E-03 |
| AUD      | GABRA2 | rs537787   | Intron        | 4   | 46288543  | T   | C   | 8446 | 0.564           | 0.09                | 0.03 | 7.50E-03 |
| AUD      | GABRA2 | rs1808851  | Intron        | 4   | 46311447  | T   | C   | 8446 | 0.435           | -0.09               | 0.03 | 7.58E-03 |
| AUD      | GABRA2 | rs279872   | Intron        | 4   | 46305194  | G   | A   | 8446 | 0.434           | -0.09               | 0.03 | 7.78E-03 |
| AUD      | CHRNA4 | rs4809541  | Intron        | 20  | 61982881  | C   | T   | 8446 | 0.861           | -0.13               | 0.05 | 8.06E-03 |

|     |        |            |                    |    |           |   |   |      |       |       |      |          |
|-----|--------|------------|--------------------|----|-----------|---|---|------|-------|-------|------|----------|
| AUD | GABRA2 | rs279873   | Intron             | 4  | 46304367  | A | G | 8446 | 0.436 | -0.09 | 0.03 | 8.09E-03 |
| AUD | GRIK1  | rs16984653 | Intron             | 21 | 31020557  | A | G | 8446 | 0.122 | -0.13 | 0.05 | 8.29E-03 |
| AUD | GSK3B  | rs6805251  | Intron             | 3  | 119560606 | T | C | 8446 | 0.596 | -0.09 | 0.03 | 8.73E-03 |
| AUD | DDC    | rs12718611 | Intron             | 7  | 50593906  | G | A | 8446 | 0.858 | 0.12  | 0.05 | 8.75E-03 |
| AUD | GABRA2 | rs13119741 | Intron             | 4  | 46289015  | G | A | 8446 | 0.554 | 0.09  | 0.03 | 8.90E-03 |
| AUD | HTR1A  | rs1799921  | Nonsynonymous      | 5  | 63257465  | T | C | 8446 | 0.013 | 0.38  | 0.15 | 8.94E-03 |
| AUD | GRIN2B | rs11055550 | Intron             | 12 | 13776283  | A | G | 8446 | 0.426 | -0.09 | 0.03 | 9.07E-03 |
| AUD | GABRA2 | rs490967   | Intron             | 4  | 46265033  | T | C | 8446 | 0.547 | 0.09  | 0.03 | 9.15E-03 |
| AUD | GRIK1  | rs2832438  | Intron             | 21 | 31137937  | T | C | 8446 | 0.124 | -0.13 | 0.05 | 9.16E-03 |
| AUD | GSK3B  | rs7644234  | Intron             | 3  | 119691611 | G | T | 8446 | 0.383 | 0.09  | 0.03 | 9.28E-03 |
| AUD | GABRA2 | rs279861   | Intron             | 4  | 46313325  | G | C | 8446 | 0.433 | -0.09 | 0.03 | 9.29E-03 |
| AUD | GABRA2 | rs35007802 | Intron             | 4  | 46299716  | A | C | 8446 | 0.434 | -0.09 | 0.03 | 9.46E-03 |
| AUD | GABRA2 | rs2350770  | Intron             | 4  | 46293307  | A | G | 8446 | 0.435 | -0.09 | 0.03 | 9.53E-03 |
| AUD | GABRA2 | rs2083423  | Intron             | 4  | 46295082  | A | G | 8446 | 0.435 | -0.09 | 0.03 | 9.71E-03 |
| AUD | GABRA2 | rs279821   | Intron             | 4  | 46346270  | T | G | 8446 | 0.433 | -0.09 | 0.03 | 9.72E-03 |
| AUD | GABRA2 | rs568144   | Intron             | 4  | 46282926  | C | G | 8446 | 0.570 | 0.09  | 0.03 | 1.00E-02 |
| AUD | GABRA2 | rs558111   | Intron             | 4  | 46284923  | T | C | 8446 | 0.567 | 0.09  | 0.03 | 1.01E-02 |
| AUD | GSK3B  | rs4687890  | Intron             | 3  | 119759173 | A | G | 8446 | 0.379 | 0.09  | 0.03 | 1.02E-02 |
| AUD | GABRA2 | rs279826   | Intron             | 4  | 46334209  | A | G | 8446 | 0.451 | -0.09 | 0.03 | 1.02E-02 |
| AUD | GRIK1  | rs363528   | Intron             | 21 | 31014359  | A | G | 8446 | 0.122 | -0.13 | 0.05 | 1.04E-02 |
| AUD | GABRA2 | rs279837   | Intron             | 4  | 46339323  | A | G | 8446 | 0.432 | -0.09 | 0.03 | 1.04E-02 |
| AUD | GABRA2 | rs279842   | Intron             | 4  | 46340956  | T | C | 8446 | 0.432 | -0.09 | 0.03 | 1.05E-02 |
| AUD | GABRA2 | rs203656   | Intron             | 4  | 46316361  | A | T | 8446 | 0.425 | -0.09 | 0.03 | 1.05E-02 |
| AUD | GABRA2 | rs279845   | Intron             | 4  | 46329723  | T | A | 8446 | 0.449 | -0.09 | 0.03 | 1.05E-02 |
| AUD | GSK3B  | rs9873477  | Intron             | 3  | 119645976 | A | G | 8446 | 0.396 | 0.09  | 0.03 | 1.05E-02 |
| AUD | GABRA2 | rs279863   | Intron             | 4  | 46313022  | C | A | 8446 | 0.445 | -0.09 | 0.03 | 1.08E-02 |
| AUD | GSK3B  | rs334563   | Intron             | 3  | 119786887 | C | A | 8446 | 0.383 | 0.09  | 0.03 | 1.10E-02 |
| AUD | GSK3B  | rs334533   | Intron             | 3  | 119792882 | C | T | 8446 | 0.379 | 0.09  | 0.03 | 1.11E-02 |
| AUD | GABRA2 | rs189957   | Intron             | 4  | 46346679  | A | G | 8446 | 0.452 | -0.08 | 0.03 | 1.11E-02 |
| AUD | GABRA2 | rs279827   | Normal_Splice_Site | 4  | 46334702  | A | G | 8446 | 0.450 | -0.08 | 0.03 | 1.11E-02 |
| AUD | GABRA2 | rs279849   | Intron             | 4  | 46320757  | G | T | 8446 | 0.434 | -0.08 | 0.03 | 1.11E-02 |
| AUD | GABRA2 | rs279828   | Intron             | 4  | 46334810  | A | C | 8446 | 0.451 | -0.08 | 0.03 | 1.13E-02 |
| AUD | GABRA2 | rs530329   | Intron             | 4  | 46281119  | C | T | 8446 | 0.569 | 0.08  | 0.03 | 1.14E-02 |
| AUD | GABRA2 | rs279856   | Intron             | 4  | 46317923  | C | A | 8446 | 0.435 | -0.08 | 0.03 | 1.15E-02 |
| AUD | GABRA2 | rs279854   | Intron             | 4  | 46319264  | A | G | 8446 | 0.434 | -0.08 | 0.03 | 1.15E-02 |
| AUD | GSK3B  | rs3732361  | Utr3               | 3  | 119542297 | A | G | 8446 | 0.607 | -0.09 | 0.03 | 1.17E-02 |
| AUD | GABRA2 | rs279867   | Intron             | 4  | 46308303  | A | C | 8446 | 0.433 | -0.08 | 0.03 | 1.19E-02 |
| AUD | GABRA2 | rs279852   | Intron             | 4  | 46319761  | G | T | 8446 | 0.434 | -0.08 | 0.03 | 1.20E-02 |
| AUD | GABRA2 | rs279841   | Intron             | 4  | 46340763  | G | A | 8446 | 0.431 | -0.08 | 0.03 | 1.21E-02 |
| AUD | GRIN2B | rs1805478  | Intron             | 12 | 13752145  | T | C | 8446 | 0.546 | -0.08 | 0.03 | 1.23E-02 |
| AUD | GABRA2 | rs10805145 | Intron             | 4  | 46358331  | C | T | 8446 | 0.547 | 0.08  | 0.03 | 1.23E-02 |
| AUD | GABRA2 | rs279838   | Intron             | 4  | 46339501  | A | G | 8446 | 0.432 | -0.08 | 0.03 | 1.23E-02 |
| AUD | GABRA2 | rs450571   | Intron             | 4  | 46311346  | A | G | 8446 | 0.434 | -0.08 | 0.03 | 1.25E-02 |

|     |        |            |          |    |           |         |   |      |       |       |      |          |
|-----|--------|------------|----------|----|-----------|---------|---|------|-------|-------|------|----------|
| AUD | GABRA2 | rs279839   | Intron   | 4  | 46339538  | G       | A | 8446 | 0.433 | -0.08 | 0.03 | 1.26E-02 |
| AUD | GABRA2 | rs279857   | Intron   | 4  | 46317759  | G       | A | 8446 | 0.435 | -0.08 | 0.03 | 1.26E-02 |
| AUD | GABRA2 | rs279848   | Intron   | 4  | 46322945  | C       | G | 8446 | 0.433 | -0.08 | 0.03 | 1.26E-02 |
| AUD | GRIN2B | rs971165   | Intron   | 12 | 13848184  | A       | C | 8446 | 0.509 | 0.08  | 0.03 | 1.29E-02 |
| AUD | GABRA2 | rs279869   | Intron   | 4  | 46307995  | G       | T | 8446 | 0.431 | -0.08 | 0.03 | 1.30E-02 |
| AUD | GABRA2 | rs1440130  | Intron   | 4  | 46333253  | T       | C | 8446 | 0.446 | -0.08 | 0.03 | 1.30E-02 |
| AUD | GRIN2B | rs11055584 | Intron   | 12 | 13843092  | A       | G | 8446 | 0.415 | -0.08 | 0.03 | 1.32E-02 |
| AUD | GRIN2B | rs1012587  | Intron   | 12 | 13854914  | T       | A | 8446 | 0.239 | 0.09  | 0.04 | 1.32E-02 |
| AUD | GSK3B  | rs4261913  | Intron   | 3  | 119546197 | C       | T | 8446 | 0.607 | -0.08 | 0.03 | 1.33E-02 |
| AUD | GABRA2 | rs28873227 | Intron   | 4  | 46294578  | A       | G | 8446 | 0.433 | -0.08 | 0.03 | 1.35E-02 |
| AUD | GABRA2 | rs175931   | Intron   | 4  | 46316323  | A       | T | 8446 | 0.433 | -0.08 | 0.03 | 1.37E-02 |
| AUD | GABRA2 | rs525630   | Intron   | 4  | 46268570  | G       | A | 8446 | 0.569 | 0.08  | 0.03 | 1.37E-02 |
| AUD | GSK3B  | rs6438553  | Intron   | 3  | 119640029 | A       | T | 8446 | 0.393 | 0.08  | 0.03 | 1.37E-02 |
| AUD | GABRA2 | rs279865   | Intron   | 4  | 46309912  | C       | G | 8446 | 0.435 | -0.08 | 0.03 | 1.40E-02 |
| AUD | GABRA2 | rs175929   | Intron   | 4  | 46338148  | A       | G | 8446 | 0.432 | -0.08 | 0.03 | 1.41E-02 |
| AUD | GABRA2 | rs537134   | Intron   | 4  | 46271268  | C       | G | 8446 | 0.569 | 0.08  | 0.03 | 1.44E-02 |
| AUD | SLC6A3 | rs28364999 | Deletion | 5  | 1400998   | CG<br>A | C | 8446 | 0.018 | -0.30 | 0.12 | 1.45E-02 |
| AUD | GSK3B  | rs1154595  | Intron   | 3  | 119736594 | C       | T | 8446 | 0.384 | 0.08  | 0.03 | 1.45E-02 |
| AUD | GABRA2 | rs279831   | Intron   | 4  | 46335812  | G       | C | 8446 | 0.449 | -0.08 | 0.03 | 1.45E-02 |
| AUD | GABRA2 | rs517134   | Intron   | 4  | 46279117  | T       | G | 8446 | 0.565 | 0.08  | 0.03 | 1.46E-02 |
| AUD | GABRA2 | rs507788   | Intron   | 4  | 46257458  | C       | T | 8446 | 0.565 | 0.08  | 0.03 | 1.46E-02 |
| AUD | GABRA2 | rs554112   | Intron   | 4  | 46262776  | A       | C | 8446 | 0.570 | 0.08  | 0.03 | 1.47E-02 |
| AUD | GABRA2 | rs1440129  | Intron   | 4  | 46333121  | C       | A | 8446 | 0.448 | -0.08 | 0.03 | 1.48E-02 |
| AUD | GABRA2 | rs183961   | Intron   | 4  | 46331028  | T       | C | 8446 | 0.449 | -0.08 | 0.03 | 1.50E-02 |
| AUD | GABRA2 | rs279846   | Intron   | 4  | 46329886  | C       | T | 8446 | 0.448 | -0.08 | 0.03 | 1.50E-02 |
| AUD | GABRA2 | rs279840   | Intron   | 4  | 46340406  | G       | T | 8446 | 0.429 | -0.08 | 0.03 | 1.50E-02 |
| AUD | GABRA2 | rs519869   | Intron   | 4  | 46285362  | G       | T | 8446 | 0.569 | 0.08  | 0.03 | 1.50E-02 |
| AUD | GABRA2 | rs2439209  | Intron   | 4  | 46274771  | C       | T | 8446 | 0.570 | 0.08  | 0.03 | 1.51E-02 |
| AUD | GABRA2 | rs548583   | Intron   | 4  | 46263344  | A       | G | 8446 | 0.570 | 0.08  | 0.03 | 1.53E-02 |
| AUD | GABRA2 | rs1822016  | Intron   | 4  | 46275776  | G       | A | 8446 | 0.570 | 0.08  | 0.03 | 1.54E-02 |
| AUD | GABRA2 | rs532363   | Intron   | 4  | 46282566  | T       | G | 8446 | 0.568 | 0.08  | 0.03 | 1.54E-02 |
| AUD | GRIN2B | rs2300233  | Intron   | 12 | 13792620  | T       | C | 8446 | 0.392 | -0.08 | 0.03 | 1.55E-02 |
| AUD | GABRA2 | rs279830   | Intron   | 4  | 46335681  | G       | A | 8446 | 0.449 | -0.08 | 0.03 | 1.58E-02 |
| AUD | CRHR1  | rs34186148 | Intron   | 17 | 43854655  | G       | C | 8446 | 0.372 | -0.08 | 0.03 | 1.60E-02 |
| AUD | GABRA2 | rs490102   | Intron   | 4  | 46273584  | C       | G | 8446 | 0.570 | 0.08  | 0.03 | 1.61E-02 |
| AUD | GABRA2 | rs526805   | Intron   | 4  | 46263391  | C       | A | 8446 | 0.569 | 0.08  | 0.03 | 1.61E-02 |
| AUD | GABRA2 | rs279833   | Intron   | 4  | 46338190  | T       | A | 8446 | 0.433 | -0.08 | 0.03 | 1.63E-02 |
| AUD | GABRA2 | rs279844   | Intron   | 4  | 46329655  | A       | T | 8446 | 0.449 | -0.08 | 0.03 | 1.64E-02 |
| AUD | GABRA2 | rs552174   | Intron   | 4  | 46269136  | C       | T | 8446 | 0.569 | 0.08  | 0.03 | 1.67E-02 |
| AUD | GABRA2 | rs279834   | Intron   | 4  | 46338299  | G       | C | 8446 | 0.433 | -0.08 | 0.03 | 1.70E-02 |
| AUD | GABRA2 | rs532780   | Intron   | 4  | 46261366  | C       | T | 8446 | 0.570 | 0.08  | 0.03 | 1.74E-02 |
| AUD | GRIN2B | rs12308271 | Intron   | 12 | 13853245  | A       | T | 8446 | 0.338 | -0.08 | 0.03 | 1.74E-02 |
| AUD | GABRA2 | rs1442059  | Intron   | 4  | 46356952  | C       | T | 8446 | 0.562 | 0.08  | 0.03 | 1.75E-02 |

|     |        |            |            |    |           |   |   |      |       |       |      |          |
|-----|--------|------------|------------|----|-----------|---|---|------|-------|-------|------|----------|
| AUD | GABRA2 | rs279843   | Intron     | 4  | 46325204  | C | T | 8446 | 0.435 | -0.08 | 0.03 | 1.76E-02 |
| AUD | GABRA2 | rs10004122 | Intron     | 4  | 46346657  | A | G | 8446 | 0.431 | -0.08 | 0.03 | 1.79E-02 |
| AUD | GABRA2 | rs279868   | Intron     | 4  | 46308110  | A | T | 8446 | 0.424 | -0.08 | 0.03 | 1.81E-02 |
| AUD | CHRNA4 | rs1044393  | Synonymous | 20 | 61982124  | A | G | 8446 | 0.881 | -0.12 | 0.05 | 1.82E-02 |
| AUD | OPRM1  | rs712242   | Intron     | 6  | 154333172 | T | C | 8446 | 0.474 | 0.08  | 0.03 | 1.85E-02 |
| AUD | GABRA2 | rs543809   | Intron     | 4  | 46274590  | G | A | 8446 | 0.569 | 0.08  | 0.03 | 1.86E-02 |
| AUD | GSK3B  | rs6800622  | Intron     | 3  | 119580678 | A | C | 8446 | 0.594 | -0.08 | 0.03 | 1.87E-02 |
| AUD | GABRA2 | rs279847   | Intron     | 4  | 46324630  | G | T | 8446 | 0.433 | -0.08 | 0.03 | 1.87E-02 |
| AUD | GABRA2 | rs505474   | Intron     | 4  | 46260587  | T | C | 8446 | 0.569 | 0.08  | 0.03 | 1.88E-02 |
| AUD | GRIN2A | rs3852745  | Intron     | 16 | 10248860  | G | T | 8446 | 0.307 | 0.08  | 0.04 | 1.91E-02 |
| AUD | GABRA2 | rs534459   | Intron     | 4  | 46256805  | A | G | 8446 | 0.563 | 0.08  | 0.03 | 1.91E-02 |
| AUD | GSK3B  | rs6795653  | Intron     | 3  | 119610565 | T | C | 8446 | 0.396 | 0.08  | 0.03 | 1.91E-02 |
| AUD | GRIN2B | rs11833339 | Intron     | 12 | 14008727  | A | G | 8446 | 0.044 | 0.19  | 0.08 | 1.92E-02 |
| AUD | GSK3B  | rs2319398  | Intron     | 3  | 119612942 | C | A | 8446 | 0.394 | 0.08  | 0.03 | 1.92E-02 |
| AUD | GSK3B  | rs6782799  | Intron     | 3  | 119610793 | C | T | 8446 | 0.395 | 0.08  | 0.03 | 1.95E-02 |
| AUD | GABRA2 | rs279866   | Intron     | 4  | 46309764  | A | G | 8446 | 0.436 | -0.08 | 0.03 | 1.98E-02 |
| AUD | GRIN2A | rs3852746  | Intron     | 16 | 10249021  | C | T | 8446 | 0.307 | 0.08  | 0.04 | 2.07E-02 |
| AUD | GABRB3 | rs12915684 | Intron     | 15 | 26816889  | A | G | 8446 | 0.278 | -0.08 | 0.04 | 2.08E-02 |
| AUD | GABRA2 | rs693547   | Intron     | 4  | 46256557  | A | T | 8446 | 0.565 | 0.08  | 0.03 | 2.12E-02 |
| AUD | GSK3B  | rs9813864  | Intron     | 3  | 119590974 | C | T | 8446 | 0.604 | -0.08 | 0.03 | 2.13E-02 |
| AUD | GABRA2 | rs577544   | Intron     | 4  | 46278859  | C | A | 8446 | 0.560 | 0.08  | 0.03 | 2.14E-02 |
| AUD | GABRA2 | rs6833452  | Intron     | 4  | 46354731  | C | T | 8446 | 0.568 | 0.08  | 0.03 | 2.22E-02 |
| AUD | GRIN2B | rs2300236  | Intron     | 12 | 13811372  | G | A | 8446 | 0.478 | 0.07  | 0.03 | 2.22E-02 |
| AUD | GABRB2 | rs7709316  | Intron     | 5  | 160725600 | C | T | 8446 | 0.067 | 0.15  | 0.07 | 2.24E-02 |
| AUD | GABRA2 | rs6447508  | Intron     | 4  | 46361545  | G | C | 8446 | 0.572 | 0.08  | 0.03 | 2.25E-02 |
| AUD | FAAH   | rs2295632  | Downstream | 1  | 46879562  | T | G | 8446 | 0.723 | -0.08 | 0.04 | 2.25E-02 |
| AUD | GSK3B  | rs9878473  | Intron     | 3  | 119650788 | T | C | 8446 | 0.395 | 0.08  | 0.03 | 2.28E-02 |
| AUD | GABRA2 | rs279822   | Intron     | 4  | 46351162  | C | A | 8446 | 0.567 | 0.08  | 0.03 | 2.31E-02 |
| AUD | CRHR1  | rs242937   | Intron     | 17 | 43898368  | A | G | 8446 | 0.561 | 0.08  | 0.03 | 2.31E-02 |
| AUD | GRIK1  | rs417979   | Intron     | 21 | 31228214  | T | G | 8446 | 0.960 | 0.19  | 0.08 | 2.32E-02 |
| AUD | GRIK1  | rs3787671  | Intron     | 21 | 31073100  | T | G | 8446 | 0.152 | -0.11 | 0.05 | 2.39E-02 |
| AUD | GABRA2 | rs526608   | Intron     | 4  | 46268681  | A | T | 8446 | 0.564 | 0.08  | 0.03 | 2.47E-02 |
| AUD | GSK3B  | rs16830567 | Intron     | 3  | 119570175 | T | C | 8446 | 0.187 | 0.09  | 0.04 | 2.50E-02 |
| AUD | DDC    | rs6593011  | Intron     | 7  | 50632796  | C | A | 8446 | 0.148 | -0.10 | 0.05 | 2.50E-02 |
| AUD | GRIK1  | rs118730   | Intron     | 21 | 31220217  | T | C | 8446 | 0.951 | 0.19  | 0.08 | 2.51E-02 |
| AUD | GRIK1  | rs363516   | Intron     | 21 | 31042500  | C | T | 8446 | 0.033 | -0.20 | 0.09 | 2.51E-02 |
| AUD | GABRB3 | rs4281679  | Intron     | 15 | 26886442  | C | T | 8446 | 0.109 | -0.12 | 0.05 | 2.52E-02 |
| AUD | GRIN2B | rs12578850 | Intron     | 12 | 13847424  | C | T | 8446 | 0.147 | 0.10  | 0.05 | 2.55E-02 |
| AUD | GSK3B  | rs12108149 | Intron     | 3  | 119721171 | T | C | 8446 | 0.186 | 0.09  | 0.04 | 2.55E-02 |
| AUD | GABRB3 | rs2017247  | Utr3       | 15 | 26789162  | T | C | 8446 | 0.738 | 0.08  | 0.04 | 2.56E-02 |
| AUD | GRIN2B | rs2041889  | Intron     | 12 | 13743245  | T | G | 8446 | 0.412 | 0.08  | 0.03 | 2.57E-02 |
| AUD | GRIN2B | rs2268110  | Intron     | 12 | 13853101  | C | T | 8446 | 0.149 | 0.10  | 0.05 | 2.59E-02 |
| AUD | GRIN1  | rs12238250 | Intron     | 9  | 140046682 | C | A | 8446 | 0.939 | -0.15 | 0.07 | 2.59E-02 |

|     |        |            |                    |    |           |   |   |      |       |       |      |          |
|-----|--------|------------|--------------------|----|-----------|---|---|------|-------|-------|------|----------|
| AUD | HTR2A  | rs12876614 | Intron             | 13 | 47463990  | C | T | 8446 | 0.207 | 0.09  | 0.04 | 2.63E-02 |
| AUD | GRIK1  | rs469563   | Intron             | 21 | 31228193  | A | G | 8446 | 0.959 | 0.19  | 0.08 | 2.67E-02 |
| AUD | GRIN2B | rs2268112  | Intron             | 12 | 13853503  | G | A | 8446 | 0.150 | 0.10  | 0.05 | 2.72E-02 |
| AUD | GRIK1  | rs2254136  | Intron             | 21 | 31047208  | G | C | 8446 | 0.159 | -0.10 | 0.04 | 2.72E-02 |
| AUD | GRIK1  | rs16984622 | Intron             | 21 | 31017620  | T | C | 8446 | 0.104 | -0.12 | 0.05 | 2.75E-02 |
| AUD | CNR1   | rs11756397 | Intron             | 6  | 88873728  | T | C | 8446 | 0.217 | 0.09  | 0.04 | 2.80E-02 |
| AUD | GSK3B  | rs6792572  | Intron             | 3  | 119636096 | A | C | 8446 | 0.396 | 0.07  | 0.03 | 2.80E-02 |
| AUD | DDC    | rs4490786  | Normal_Splice_Site | 7  | 50544314  | C | T | 8446 | 0.207 | 0.09  | 0.04 | 2.86E-02 |
| AUD | GRIK1  | rs363544   | Intron             | 21 | 31050277  | T | C | 8446 | 0.162 | -0.10 | 0.04 | 2.88E-02 |
| AUD | GRIN2B | rs11055589 | Intron             | 12 | 13848219  | G | A | 8446 | 0.147 | 0.10  | 0.05 | 2.88E-02 |
| AUD | GRIN2A | rs11074613 | Intron             | 16 | 10248694  | G | A | 8446 | 0.307 | 0.08  | 0.04 | 2.89E-02 |
| AUD | GRIN2B | rs2216129  | Intron             | 12 | 13853596  | C | T | 8446 | 0.492 | 0.07  | 0.03 | 2.90E-02 |
| AUD | CRHR1  | rs4074461  | Intron             | 17 | 43855156  | G | T | 8446 | 0.535 | -0.07 | 0.03 | 2.97E-02 |
| AUD | FAAH   | rs2145408  | Intron             | 1  | 46861907  | A | G | 8446 | 0.736 | -0.08 | 0.04 | 2.97E-02 |
| AUD | GRIN2A | rs7501071  | Intron             | 16 | 10248789  | G | A | 8446 | 0.307 | 0.08  | 0.04 | 2.98E-02 |
| AUD | GSK3B  | rs2873950  | Intron             | 3  | 119547062 | A | C | 8446 | 0.187 | 0.09  | 0.04 | 3.01E-02 |
| AUD | OPRK1  | rs6473797  | Intron             | 8  | 54152982  | T | C | 8446 | 0.246 | -0.08 | 0.04 | 3.06E-02 |
| AUD | HTR2A  | rs34420017 | Intron             | 13 | 47443889  | A | G | 8446 | 0.208 | 0.09  | 0.04 | 3.08E-02 |
| AUD | GSK3B  | rs12635018 | Intron             | 3  | 119749770 | C | T | 8446 | 0.187 | 0.09  | 0.04 | 3.10E-02 |
| AUD | GSK3B  | rs12629015 | Intron             | 3  | 119618053 | A | G | 8446 | 0.188 | 0.09  | 0.04 | 3.13E-02 |
| AUD | GRIN2B | rs74067128 | Intron             | 12 | 14004012  | A | T | 8446 | 0.037 | 0.19  | 0.09 | 3.16E-02 |
| AUD | GRIN2B | rs11836523 | Intron             | 12 | 13857884  | T | C | 8446 | 0.091 | -0.12 | 0.06 | 3.18E-02 |
| AUD | CRHR1  | rs173365   | Intron             | 17 | 43901074  | A | G | 8446 | 0.559 | 0.07  | 0.03 | 3.18E-02 |
| AUD | DDC    | rs3779084  | Intron             | 7  | 50568735  | A | G | 8446 | 0.205 | 0.09  | 0.04 | 3.18E-02 |
| AUD | HTR2A  | rs6561335  | Intron             | 13 | 47433497  | G | A | 8446 | 0.728 | 0.08  | 0.04 | 3.19E-02 |
| AUD | FAAH   | rs324418   | Intron             | 1  | 46872698  | A | G | 8446 | 0.223 | 0.08  | 0.04 | 3.20E-02 |
| AUD | GSK3B  | rs10934500 | Intron             | 3  | 119568123 | T | C | 8446 | 0.187 | 0.09  | 0.04 | 3.20E-02 |
| AUD | GABRB3 | rs7169596  | Intron             | 15 | 26808859  | T | C | 8446 | 0.261 | -0.08 | 0.04 | 3.22E-02 |
| AUD | NTRK2  | rs77438563 | Intron             | 9  | 87579803  | C | T | 8446 | 0.078 | -0.13 | 0.06 | 3.27E-02 |
| AUD | GABRB3 | rs2114485  | Intron             | 15 | 26802824  | G | A | 8446 | 0.733 | 0.08  | 0.04 | 3.27E-02 |
| AUD | GABRB3 | rs12901061 | Intron             | 15 | 26803412  | C | G | 8446 | 0.262 | -0.08 | 0.04 | 3.34E-02 |
| AUD | GABRB3 | rs2052991  | Intron             | 15 | 26803543  | G | A | 8446 | 0.260 | -0.08 | 0.04 | 3.34E-02 |
| AUD | GRIN2B | rs7297761  | Intron             | 12 | 13853579  | A | G | 8446 | 0.380 | -0.07 | 0.03 | 3.35E-02 |
| AUD | GRIN2B | rs74067133 | Intron             | 12 | 14006943  | T | C | 8446 | 0.038 | 0.18  | 0.09 | 3.36E-02 |
| AUD | GSK3B  | rs1574154  | Intron             | 3  | 119627247 | T | C | 8446 | 0.188 | 0.09  | 0.04 | 3.36E-02 |
| AUD | GSK3B  | rs12054090 | Intron             | 3  | 119668285 | T | C | 8446 | 0.187 | 0.09  | 0.04 | 3.36E-02 |
| AUD | CRHR1  | rs9303521  | Intron             | 17 | 43805194  | T | G | 8446 | 0.531 | 0.07  | 0.03 | 3.37E-02 |
| AUD | GSK3B  | rs10433404 | Intron             | 3  | 119693240 | C | G | 8446 | 0.186 | 0.09  | 0.04 | 3.38E-02 |
| AUD | GSK3B  | rs4340737  | Intron             | 3  | 119622014 | C | T | 8446 | 0.187 | 0.09  | 0.04 | 3.38E-02 |
| AUD | GSK3B  | rs7639388  | Intron             | 3  | 119609953 | T | A | 8446 | 0.187 | 0.09  | 0.04 | 3.39E-02 |
| AUD | GRIN2B | rs2268099  | Intron             | 12 | 13780726  | G | A | 8446 | 0.383 | -0.07 | 0.03 | 3.40E-02 |
| AUD | GABRA2 | rs519270   | Intron             | 4  | 46274451  | T | C | 8446 | 0.555 | 0.07  | 0.03 | 3.40E-02 |
| AUD | GSK3B  | rs62264739 | Intron             | 3  | 119688402 | A | G | 8446 | 0.187 | 0.09  | 0.04 | 3.44E-02 |



|     |        |             |            |    |           |     |   |      |       |       |      |          |
|-----|--------|-------------|------------|----|-----------|-----|---|------|-------|-------|------|----------|
| AUD | GSK3B  | rs6808874   | Intron     | 3  | 119557851 | A   | T | 8446 | 0.187 | 0.09  | 0.04 | 3.45E-02 |
| AUD | DRD3   | rs56087035  | Intron     | 3  | 113852778 | T   | C | 8446 | 0.017 | 0.26  | 0.12 | 3.47E-02 |
| AUD | GABRB2 | rs2964778   | Intron     | 5  | 160900642 | C   | T | 8446 | 0.032 | 0.20  | 0.09 | 3.48E-02 |
| AUD | GRIN2A | rs79225924  | Intron     | 16 | 10167872  | C   | T | 8446 | 0.012 | 0.32  | 0.15 | 3.48E-02 |
| AUD | GRIN2A | rs2008342   | Intron     | 16 | 10003192  | A   | C | 8446 | 0.261 | 0.08  | 0.04 | 3.51E-02 |
| AUD | CRHR1  | rs242924    | Intron     | 17 | 43885367  | G   | T | 8446 | 0.439 | 0.07  | 0.03 | 3.52E-02 |
| AUD | GABRB3 | rs8033560   | Intron     | 15 | 26815561  | G   | A | 8446 | 0.264 | -0.08 | 0.04 | 3.53E-02 |
| AUD | GSK3B  | rs4688046   | Intron     | 3  | 119663870 | T   | C | 8446 | 0.186 | 0.09  | 0.04 | 3.55E-02 |
| AUD | PTTG2  | rs200376306 | Frameshift | 4  | 37962608  | CAT | C | 8446 | 0.011 | 0.33  | 0.16 | 3.57E-02 |
| AUD | GSK3B  | rs4688042   | Intron     | 3  | 119590880 | A   | G | 8446 | 0.188 | 0.09  | 0.04 | 3.58E-02 |
| AUD | GSK3B  | rs12638973  | Intron     | 3  | 119684827 | C   | T | 8446 | 0.187 | 0.09  | 0.04 | 3.62E-02 |
| AUD | OPRK1  | rs6473798   | Intron     | 8  | 54153105  | C   | T | 8446 | 0.246 | -0.08 | 0.04 | 3.62E-02 |
| AUD | HTR2A  | rs594242    | Intron     | 13 | 47458052  | C   | G | 8446 | 0.785 | -0.08 | 0.04 | 3.64E-02 |
| AUD | GRIN2B | rs73047488  | Intron     | 12 | 13758325  | G   | C | 8446 | 0.349 | -0.07 | 0.03 | 3.64E-02 |
| AUD | GRIN2B | rs11055670  | Intron     | 12 | 14051237  | T   | A | 8446 | 0.090 | -0.12 | 0.06 | 3.66E-02 |
| AUD | GABRB3 | rs2114217   | Intron     | 15 | 26960029  | T   | A | 8446 | 0.832 | -0.09 | 0.04 | 3.67E-02 |
| AUD | GSK3B  | rs12634476  | Intron     | 3  | 119678825 | G   | A | 8446 | 0.186 | 0.09  | 0.04 | 3.67E-02 |
| AUD | GSK3B  | rs10934502  | Intron     | 3  | 119669136 | T   | C | 8446 | 0.186 | 0.09  | 0.04 | 3.69E-02 |
| AUD | GABRA2 | rs3822051   | Intron     | 4  | 46256712  | T   | C | 8446 | 0.255 | -0.08 | 0.04 | 3.72E-02 |
| AUD | GSK3B  | rs4688047   | Intron     | 3  | 119682761 | C   | T | 8446 | 0.186 | 0.09  | 0.04 | 3.72E-02 |
| AUD | GSK3B  | rs62264749  | Intron     | 3  | 119747919 | T   | C | 8446 | 0.188 | 0.09  | 0.04 | 3.73E-02 |
| AUD | GABRB3 | rs4264366   | Intron     | 15 | 26808989  | C   | T | 8446 | 0.264 | -0.08 | 0.04 | 3.76E-02 |
| AUD | GRIK1  | rs743321    | Intron     | 21 | 31018770  | G   | T | 8446 | 0.104 | -0.11 | 0.05 | 3.78E-02 |
| AUD | GRIN2B | rs59457485  | Intron     | 12 | 14009694  | T   | C | 8446 | 0.039 | 0.18  | 0.08 | 3.81E-02 |
| AUD | GSK3B  | rs12634889  | Intron     | 3  | 119596514 | A   | G | 8446 | 0.187 | 0.09  | 0.04 | 3.82E-02 |
| AUD | HTR2A  | rs1002513   | Intron     | 13 | 47454440  | G   | A | 8446 | 0.208 | 0.08  | 0.04 | 3.82E-02 |
| AUD | CRHR1  | rs110402    | Intron     | 17 | 43880047  | G   | A | 8446 | 0.437 | 0.07  | 0.03 | 3.82E-02 |
| AUD | GRIN2B | rs4764027   | Intron     | 12 | 13835534  | A   | C | 8446 | 0.509 | -0.07 | 0.03 | 3.83E-02 |
| AUD | GRIN2B | rs10505778  | Intron     | 12 | 14125564  | A   | G | 8446 | 0.353 | -0.07 | 0.03 | 3.84E-02 |
| AUD | NTRK2  | rs75887034  | Intron     | 9  | 87553443  | G   | T | 8446 | 0.042 | -0.17 | 0.08 | 3.85E-02 |
| AUD | GRIN2A | rs79479110  | Intron     | 16 | 10168899  | T   | C | 8446 | 0.012 | 0.31  | 0.15 | 3.85E-02 |
| AUD | GSK3B  | rs10934505  | Intron     | 3  | 119767322 | A   | T | 8446 | 0.190 | 0.09  | 0.04 | 3.89E-02 |
| AUD | GRIK1  | rs2832428   | Intron     | 21 | 31074039  | A   | C | 8446 | 0.117 | -0.10 | 0.05 | 3.95E-02 |
| AUD | GRIN2B | rs4764014   | Intron     | 12 | 13763321  | G   | A | 8446 | 0.338 | -0.07 | 0.03 | 3.97E-02 |
| AUD | CNR1   | rs10944345  | Intron     | 6  | 88871626  | T   | C | 8446 | 0.236 | 0.08  | 0.04 | 3.97E-02 |
| AUD | GSK3B  | rs4688054   | Intron     | 3  | 119733710 | T   | C | 8446 | 0.188 | 0.09  | 0.04 | 4.03E-02 |
| AUD | GRIK1  | rs11908807  | Intron     | 21 | 31019853  | C   | T | 8446 | 0.105 | -0.11 | 0.05 | 4.05E-02 |
| AUD | OPRM1  | rs1294092   | Intron     | 6  | 154335673 | A   | G | 8446 | 0.160 | 0.09  | 0.04 | 4.06E-02 |
| AUD | GABRB3 | rs3751582   | Intron     | 15 | 26806064  | T   | C | 8446 | 0.266 | -0.08 | 0.04 | 4.08E-02 |
| AUD | GABRA2 | rs3775282   | Intron     | 4  | 46321863  | T   | C | 8446 | 0.179 | -0.09 | 0.04 | 4.08E-02 |
| AUD | DDC    | rs7808025   | Intron     | 7  | 50576903  | G   | A | 8446 | 0.211 | 0.08  | 0.04 | 4.08E-02 |
| AUD | GSK3B  | rs4688059   | Intron     | 3  | 119811568 | G   | A | 8446 | 0.186 | 0.09  | 0.04 | 4.11E-02 |
| AUD | HTR2A  | rs582385    | Intron     | 13 | 47445994  | A   | G | 8446 | 0.192 | 0.08  | 0.04 | 4.14E-02 |

|     |         |            |        |    |           |   |   |      |       |       |      |          |
|-----|---------|------------|--------|----|-----------|---|---|------|-------|-------|------|----------|
| AUD | GSK3B   | rs62264747 | Intron | 3  | 119741298 | T | C | 8446 | 0.186 | 0.09  | 0.04 | 4.20E-02 |
| AUD | NTRK2   | rs7019212  | Intron | 9  | 87575074  | T | G | 8446 | 0.086 | -0.12 | 0.06 | 4.28E-02 |
| AUD | GRIN2B  | rs56317148 | Intron | 12 | 14018127  | A | G | 8446 | 0.040 | 0.17  | 0.08 | 4.30E-02 |
| AUD | GRIK1   | rs464144   | Intron | 21 | 31210998  | C | T | 8446 | 0.385 | -0.07 | 0.03 | 4.30E-02 |
| AUD | GRIN2B  | rs11055557 | Intron | 12 | 13788827  | G | A | 8446 | 0.346 | -0.07 | 0.03 | 4.32E-02 |
| AUD | HTR2A   | rs666693   | Intron | 13 | 47446916  | C | T | 8446 | 0.192 | 0.08  | 0.04 | 4.37E-02 |
| AUD | GRIN2B  | rs4763354  | Intron | 12 | 13734352  | G | A | 8446 | 0.567 | -0.07 | 0.03 | 4.41E-02 |
| AUD | GRIN2A  | rs1868285  | Intron | 16 | 10122457  | C | G | 8446 | 0.967 | 0.19  | 0.09 | 4.43E-02 |
| AUD | TPH2    | rs1487278  | Intron | 12 | 72400851  | T | C | 8446 | 0.226 | 0.08  | 0.04 | 4.43E-02 |
| AUD | GSK3B   | rs58863896 | Intron | 3  | 119785527 | C | A | 8446 | 0.186 | 0.08  | 0.04 | 4.47E-02 |
| AUD | CRHR1   | rs12950522 | Intron | 17 | 43859106  | A | C | 8446 | 0.457 | 0.07  | 0.03 | 4.47E-02 |
| AUD | GRIK1   | rs743320   | Intron | 21 | 31018915  | G | A | 8446 | 0.105 | -0.11 | 0.05 | 4.48E-02 |
| AUD | GRIK1   | rs2300315  | Intron | 21 | 31078003  | T | C | 8446 | 0.124 | -0.10 | 0.05 | 4.52E-02 |
| AUD | CRHR1   | rs171440   | Intron | 17 | 43893487  | G | A | 8446 | 0.461 | 0.07  | 0.03 | 4.54E-02 |
| AUD | NTRK2   | rs10868238 | Intron | 9  | 87530935  | T | C | 8446 | 0.600 | 0.07  | 0.03 | 4.55E-02 |
| AUD | GSK3B   | rs62264706 | Intron | 3  | 119560856 | G | T | 8446 | 0.186 | 0.08  | 0.04 | 4.58E-02 |
| AUD | GRIN2B  | rs11832404 | Intron | 12 | 14006305  | T | C | 8446 | 0.038 | 0.17  | 0.09 | 4.59E-02 |
| AUD | CNR1    | rs806375   | Utr5   | 6  | 88858521  | A | T | 8446 | 0.439 | 0.07  | 0.03 | 4.60E-02 |
| AUD | GABRB2  | rs3850733  | Intron | 5  | 160738317 | C | A | 8446 | 0.065 | 0.13  | 0.07 | 4.62E-02 |
| AUD | OPRM1   | rs2075572  | Intron | 6  | 154412004 | G | C | 8446 | 0.567 | -0.07 | 0.03 | 4.76E-02 |
| AUD | GRIN2B  | rs11835020 | Intron | 12 | 14016610  | A | C | 8446 | 0.040 | 0.17  | 0.08 | 4.76E-02 |
| AUD | SLC18A2 | rs363230   | Intron | 10 | 119029515 | C | T | 8446 | 0.513 | 0.07  | 0.03 | 4.77E-02 |
| AUD | GRIN2B  | rs57382938 | Intron | 12 | 13858771  | T | C | 8446 | 0.105 | -0.11 | 0.05 | 4.81E-02 |
| AUD | CRHR1   | rs7209436  | Intron | 17 | 43870142  | C | T | 8446 | 0.425 | 0.07  | 0.03 | 4.83E-02 |
| AUD | GRIN2B  | rs57055881 | Intron | 12 | 14007497  | T | C | 8446 | 0.039 | 0.17  | 0.08 | 4.87E-02 |
| AUD | GABRB2  | rs869647   | Intron | 5  | 160739626 | A | G | 8446 | 0.065 | 0.13  | 0.07 | 4.87E-02 |
| AUD | DRD3    | rs79626250 | Intron | 3  | 113894684 | T | A | 8446 | 0.027 | -0.20 | 0.10 | 4.93E-02 |
| AUD | GRIK1   | rs16984636 | Intron | 21 | 31019785  | T | G | 8446 | 0.104 | -0.10 | 0.05 | 4.93E-02 |
| AUD | DDC     | rs11575521 | Intron | 7  | 50535497  | C | A | 8446 | 0.110 | 0.10  | 0.05 | 4.94E-02 |

<sup>a</sup> AF: Allele freq for ALT allele.

<sup>b</sup> Positive value indicates ALT allele is the risk allele.

Supplementary table 4 Single-point SNP associations ( $5 \times 10^{-5} < P < 10^{-4}$ ) to any of four SUDs in NESARC-III EA.

| Disorder | Chr | Pos       | SNP         | Gene         | Function      | Ref | Alt | N    | AF <sup>a</sup> | Effect <sup>b</sup> | SE   | Pvalue   |
|----------|-----|-----------|-------------|--------------|---------------|-----|-----|------|-----------------|---------------------|------|----------|
| AUD      | 2   | 163697314 | rs13031375  | Intergenic   | Intergenic    | G   | T   | 8446 | 0.142           | -0.19               | 0.05 | 6.23E-05 |
| AUD      | 2   | 144208523 | rs35942385  | ARHGAP15     | Intron        | G   | T   | 8446 | 0.369           | -0.13               | 0.03 | 7.14E-05 |
| AUD      | 2   | 163706766 | rs56900781  | Intergenic   | Intergenic    | C   | T   | 8446 | 0.603           | 0.14                | 0.03 | 7.88E-05 |
| AUD      | 17  | 48456193  | rs12450550  | EME1         | Nonsynonymous | T   | C   | 8446 | 0.268           | -0.15               | 0.04 | 7.94E-05 |
| AUD      | 2   | 208994045 | rs2242073   | CRYGC        | Intron        | T   | G   | 8446 | 0.168           | -0.17               | 0.04 | 8.16E-05 |
| AUD      | 7   | 98957880  | rs740160    | ARPC1A       | Intron        | C   | T   | 8446 | 0.043           | -0.32               | 0.08 | 8.41E-05 |
| AUD      | 1   | 165370757 | rs283690    | RXRG         | Intron        | G   | A   | 8446 | 0.507           | 0.13                | 0.03 | 8.78E-05 |
| AUD      | 6   | 116325142 | rs3756772   | FRK          | Nonsynonymous | C   | T   | 8446 | 0.425           | 0.13                | 0.03 | 9.28E-05 |
| AUD      | 2   | 144187516 | rs12991555  | ARHGAP15     | Intron        | A   | T   | 8446 | 0.367           | -0.13               | 0.03 | 9.39E-05 |
| AUD      | 7   | 99118801  | rs11761528  | ZKSCAN5      | Intron        | C   | T   | 8446 | 0.079           | -0.24               | 0.06 | 9.62E-05 |
| AUD      | 7   | 130568334 | rs157913    | LOC646329    | Intron        | A   | C   | 8446 | 0.578           | 0.13                | 0.03 | 9.86E-05 |
| NUD      | 15  | 36139024  | rs2646782   | LOC100507466 | Intron        | A   | G   | 8353 | 0.548           | 0.13                | 0.03 | 5.38E-05 |
| NUD      | 10  | 84088633  | rs7912362   | NRG3         | Intron        | G   | T   | 8353 | 0.192           | -0.16               | 0.04 | 5.49E-05 |
| NUD      | 19  | 58861808  | rs145144275 | A1BG         | Nonsynonymous | A   | G   | 8353 | 0.010           | -0.64               | 0.16 | 5.56E-05 |
| NUD      | 10  | 84022385  | rs72827304  | NRG3         | Intron        | A   | C   | 8353 | 0.135           | -0.19               | 0.05 | 5.57E-05 |
| NUD      | 10  | 84110196  | rs6584663   | NRG3         | Intron        | G   | C   | 8353 | 0.191           | -0.16               | 0.04 | 5.78E-05 |
| NUD      | 10  | 84091078  | rs3904726   | NRG3         | Intron        | T   | C   | 8353 | 0.130           | -0.19               | 0.05 | 6.22E-05 |
| NUD      | 10  | 84088903  | rs7088954   | NRG3         | Intron        | G   | T   | 8353 | 0.191           | -0.16               | 0.04 | 6.23E-05 |
| NUD      | 2   | 136407479 | rs1446585   | R3HDM1       | Intron        | A   | G   | 8353 | 0.326           | -0.14               | 0.03 | 6.4E-05  |
| NUD      | 10  | 84112020  | rs7914005   | NRG3         | Intron        | C   | T   | 8353 | 0.175           | -0.17               | 0.04 | 6.5E-05  |
| NUD      | 6   | 116325142 | rs3756772   | FRK          | Nonsynonymous | C   | T   | 8353 | 0.425           | 0.13                | 0.03 | 7.3E-05  |
| NUD      | 13  | 67694136  | rs1028899   | PCDH9        | Intron        | G   | A   | 8353 | 0.936           | -0.26               | 0.07 | 7.81E-05 |
| NUD      | 10  | 84094052  | rs7900818   | NRG3         | Intron        | T   | C   | 8353 | 0.216           | -0.15               | 0.04 | 7.86E-05 |
| NUD      | 10  | 84080228  | rs10884538  | NRG3         | Intron        | C   | T   | 8353 | 0.215           | -0.15               | 0.04 | 8.13E-05 |
| NUD      | 2   | 120413984 | rs116625089 | PCDP1        | Nonsynonymous | C   | G   | 8353 | 0.018           | -0.47               | 0.12 | 8.48E-05 |
| NUD      | 10  | 84115932  | rs1937965   | NRG3         | Intron        | T   | C   | 8353 | 0.191           | -0.16               | 0.04 | 8.6E-05  |
| NUD      | 13  | 67692751  | rs17588668  | PCDH9        | Intron        | A   | G   | 8353 | 0.062           | 0.26                | 0.07 | 8.68E-05 |
| NUD      | 10  | 84092199  | rs11193778  | NRG3         | Intron        | C   | G   | 8353 | 0.130           | -0.19               | 0.05 | 8.77E-05 |
| NUD      | 11  | 100493240 | rs1216526   | Intergenic   | Intergenic    | G   | C   | 8353 | 0.839           | -0.17               | 0.04 | 8.82E-05 |
| NUD      | 2   | 135837906 | rs7570971   | RAB3GAP1     | Intron        | C   | A   | 8353 | 0.370           | -0.13               | 0.03 | 9.08E-05 |
| NUD      | 10  | 84093523  | rs3862549   | NRG3         | Intron        | G   | C   | 8353 | 0.131           | -0.19               | 0.05 | 9.47E-05 |
| NUD      | 10  | 84012865  | rs11193199  | NRG3         | Intron        | A   | G   | 8353 | 0.135           | -0.18               | 0.05 | 9.5E-05  |
| NUD      | 13  | 67694464  | rs9529189   | PCDH9        | Intron        | C   | T   | 8353 | 0.935           | -0.26               | 0.07 | 9.7E-05  |
| NUD      | 13  | 67695402  | rs9571714   | PCDH9        | Intron        | C   | T   | 8353 | 0.937           | -0.26               | 0.07 | 9.71E-05 |
| CUD      | 7   | 25687828  | rs1859041   | Intergenic   | Intergenic    | A   | G   | 4913 | 0.583           | 0.22                | 0.06 | 6.57E-05 |
| CUD      | 15  | 58852526  | rs7179938   | LIPC         | Intron        | A   | C   | 4913 | 0.984           | -0.88               | 0.22 | 7.16E-05 |
| CUD      | 22  | 38715222  | rs1997644   | Intergenic   | Intergenic    | G   | A   | 4913 | 0.531           | 0.22                | 0.05 | 8.23E-05 |
| CUD      | 15  | 58851684  | rs2414601   | LIPC         | Intron        | C   | T   | 4913 | 0.985           | -0.87               | 0.22 | 8.28E-05 |
| CUD      | 15  | 58854218  | rs1839927   | LIPC         | Intron        | G   | A   | 4913 | 0.984           | -0.87               | 0.22 | 8.69E-05 |

|         |    |           |             |            |               |   |   |       |       |       |      |          |
|---------|----|-----------|-------------|------------|---------------|---|---|-------|-------|-------|------|----------|
| CUD     | 15 | 58852788  | rs7180795   | LIPC       | Intron        | G | A | 4913  | 0.984 | -0.87 | 0.22 | 8.78E-05 |
| CUD     | 6  | 153296541 | rs2073260   | FBXO5      | Nonsynonymous | G | C | 4913  | 0.671 | -0.23 | 0.06 | 8.81E-05 |
| CUD     | 15 | 58851677  | rs2414600   | LIPC       | Intron        | C | A | 4913  | 0.985 | -0.86 | 0.22 | 9.31E-05 |
| CUD     | 15 | 58853079  | rs3829462   | LIPC       | Nonsynonymous | C | A | 4913  | 0.980 | -0.85 | 0.22 | 9.36E-05 |
| CUD     | 15 | 58854587  | rs7170227   | LIPC       | Intron        | A | G | 4913  | 0.985 | -0.86 | 0.22 | 9.44E-05 |
| CUD     | 15 | 58865388  | rs74016912  | Intergenic | Intergenic    | C | A | 4913  | 0.015 | 0.87  | 0.22 | 9.44E-05 |
| CUD     | 15 | 58850734  | rs2414593   | LIPC       | Intron        | T | C | 4913  | 0.984 | -0.86 | 0.22 | 9.55E-05 |
| CUD     | 15 | 58851169  | rs2414597   | LIPC       | Intron        | A | C | 4913  | 0.984 | -0.86 | 0.22 | 9.61E-05 |
| CUD     | 15 | 58854506  | rs10851636  | LIPC       | Intron        | T | C | 4913  | 0.984 | -0.86 | 0.22 | 9.65E-05 |
| CUD     | 15 | 58852669  | rs7181592   | LIPC       | Intron        | T | C | 4913  | 0.985 | -0.86 | 0.22 | 9.66E-05 |
| CUD     | 15 | 58854439  | rs8030903   | LIPC       | Intron        | C | T | 4913  | 0.985 | -0.86 | 0.22 | 9.66E-05 |
| CUD     | 15 | 58852639  | rs7180130   | LIPC       | Intron        | A | G | 4913  | 0.985 | -0.86 | 0.22 | 9.68E-05 |
| CUD     | 15 | 58867080  | rs74016918  | Intergenic | Intergenic    | T | C | 4913  | 0.015 | 0.86  | 0.22 | 9.73E-05 |
| CUD     | 15 | 58855368  | rs11071390  | LIPC       | Intron        | G | A | 4913  | 0.985 | -0.86 | 0.22 | 9.74E-05 |
| CUD     | 15 | 58851369  | rs2414598   | LIPC       | Intron        | G | A | 4913  | 0.985 | -0.86 | 0.22 | 9.76E-05 |
| CUD     | 15 | 58867207  | rs74016919  | Intergenic | Intergenic    | G | T | 4913  | 0.015 | 0.86  | 0.22 | 9.84E-05 |
| CUD     | 15 | 58851619  | rs2414599   | LIPC       | Intron        | C | T | 4913  | 0.984 | -0.86 | 0.22 | 9.91E-05 |
| NMPOUD  | 21 | 31661691  | rs8127420   | KRTAP25-1  | Nonsynonymous | A | G | 4305  | 0.293 | -0.35 | 0.09 | 8.18E-05 |
| Any SUD | 7  | 115369270 | rs78689621  | Intergenic | Intergenic    | C | G | 10484 | 0.050 | -0.28 | 0.07 | 5.21E-05 |
| Any SUD | 7  | 115372297 | rs78329989  | Intergenic | Intergenic    | G | A | 10484 | 0.051 | -0.27 | 0.07 | 6.34E-05 |
| Any SUD | 2  | 208994045 | rs2242073   | CRYGC      | Intron        | T | G | 10484 | 0.167 | -0.15 | 0.04 | 7.12E-05 |
| Any SUD | 7  | 115379708 | rs77794355  | Intergenic | Intergenic    | C | T | 10484 | 0.050 | -0.27 | 0.07 | 7.44E-05 |
| Any SUD | 7  | 115353131 | rs78346484  | Intergenic | Intergenic    | T | G | 10484 | 0.049 | -0.27 | 0.07 | 7.47E-05 |
| Any SUD | 7  | 115370568 | rs80312226  | Intergenic | Intergenic    | C | T | 10484 | 0.050 | -0.27 | 0.07 | 7.73E-05 |
| Any SUD | 7  | 115367094 | rs114763305 | Intergenic | Intergenic    | C | T | 10484 | 0.049 | -0.27 | 0.07 | 7.85E-05 |
| Any SUD | 7  | 115369325 | rs79679457  | Intergenic | Intergenic    | C | A | 10484 | 0.050 | -0.27 | 0.07 | 9.19E-05 |
| Any SUD | 16 | 22237118  | rs9935059   | EEF2K      | Nonsynonymous | A | G | 10484 | 0.074 | -0.22 | 0.06 | 9.28E-05 |
| Any SUD | 2  | 144248718 | rs35789697  | ARHGAP15   | Intron        | G | A | 10484 | 0.368 | -0.12 | 0.03 | 9.55E-05 |
| Any SUD | 7  | 115348085 | rs6975616   | Intergenic | Intergenic    | A | T | 10484 | 0.048 | -0.28 | 0.07 | 9.81E-05 |
| Any SUD | 7  | 115374498 | rs6958606   | Intergenic | Intergenic    | C | T | 10484 | 0.050 | -0.26 | 0.07 | 9.87E-05 |

<sup>a</sup> AF: Allele freq for ALT allele.

<sup>b</sup> Positive value indicates ALT allele is the risk allele.

Supplementary table 5 Gene-based association ( $10^{-4} < P < 5 \times 10^{-4}$ ) of uncommon variants to four SUDs in NESARC-III EA.

| Disorder | Gene     | Range                                                                                                                           | N    | Num of Poly variants | Q        | rho | Pvalue(EA) | Pvalue(AA) | Pvalue (Burden Meta) |
|----------|----------|---------------------------------------------------------------------------------------------------------------------------------|------|----------------------|----------|-----|------------|------------|----------------------|
| AUD      | TUFT1    | 1:151512780-151556059,1:151512780-151556059                                                                                     | 8446 | 2                    | 69679.9  | 0.2 | 1.42E-04   | 3.43E-01   | 6.80E-01             |
| AUD      | TACC1    | 8:38644721-38710546,8:38644721-38710546,8:38585703-38710546                                                                     | 8446 | 1                    | 22137.2  | 0   | 1.75E-04   | 4.57E-01   | 4.30E-02             |
| AUD      | ZNF835   | 19:57174952-57184246                                                                                                            | 8446 | 1                    | 115151.0 | 0   | 2.52E-04   | NA         | 7.40E-01             |
| AUD      | B3GALT4  | 6_dbb_hap3:4526238-4527924,6_mcf_hap5:4718690-4720376,6_qbl_hap6:4477155-4478841,6:33244916-33246602,6_cox_hap2:4688726-4690412 | 8446 | 1                    | 107638.0 | 0   | 3.63E-04   | 3.07E-01   | 6.28E-02             |
| AUD      | ARHGAP22 | 10:49654078-49813138                                                                                                            | 8446 | 2                    | 120595.0 | 0   | 4.35E-04   | 1.00E+00   | 1.93E-02             |
| AUD      | A1BG     | 19:58858171-58864865                                                                                                            | 8446 | 1                    | 89431.7  | 0   | 4.50E-04   | 8.35E-01   | 1.03E-02             |
| NUD      | TACC1    | 8:38644721-38710546,8:38644721-38710546,8:38585703-38710546                                                                     | 8353 | 1                    | 25027.1  | 0   | 1.09E-04   | 8.27E-01   | 3.73E-01             |
| NUD      | B4GALT6  | 18:29202208-29264686                                                                                                            | 8353 | 2                    | 106390.0 | 0   | 1.21E-04   | 5.75E-01   | 4.61E-02             |
| NUD      | SLC2A13  | 12:40148822-40499661                                                                                                            | 8353 | 3                    | 137772.0 | 0   | 1.39E-04   | 1.30E-01   | 1.14E-03             |
| NUD      | PPIL3    | 2:201735678-201753849,2:201735678-201753849                                                                                     | 8353 | 1                    | 64952.3  | 0   | 1.42E-04   | 1.26E-01   | 4.44E-04             |
| NUD      | IGSF5    | 21:41117333-41174023                                                                                                            | 8353 | 8                    | 230799.0 | 0   | 1.52E-04   | 1.70E-02   | 1.38E-01             |
| NUD      | LIPE     | 19:42905665-42931578                                                                                                            | 8353 | 6                    | 109415.0 | 0   | 1.59E-04   | 1.00E+00   | 1.68E-01             |
| NUD      | ARHGAP22 | 10:49654078-49813138                                                                                                            | 8353 | 2                    | 134052.0 | 0   | 2.41E-04   | 3.70E-01   | 8.69E-04             |
| NUD      | NOC2L    | 1:879582-894679                                                                                                                 | 8353 | 1                    | 46282.9  | 0   | 2.61E-04   | 1.00E+00   | 3.83E-01             |
| NUD      | ARL13B   | 3:93698982-93774522,3:93698982-93774522,3:93698982-93774522,3:93698982-93774522,3:93698982-93774522                             | 8353 | 3                    | 78593.0  | 0.2 | 2.71E-04   | 1.00E+00   | 1.69E-02             |
| NUD      | PCDP1    | 2:120302024-120414237                                                                                                           | 8353 | 3                    | 152717.0 | 0   | 3.78E-04   | 6.79E-01   | 5.12E-01             |
| NUD      | TTLL6    | 17:46839592-46871686,17:46839592-46894469                                                                                       | 8353 | 4                    | 200737.0 | 0   | 4.13E-04   | 5.44E-02   | 5.33E-03             |
| NUD      | TAGLN    | 11:117070039-117075508,11:117070039-117075508                                                                                   | 8353 | 1                    | 64035.8  | 0   | 4.23E-04   | 7.77E-01   | 4.68E-01             |
| NUD      | IMPG1    | 6:76631061-76782335                                                                                                             | 8353 | 6                    | 133953.0 | 0   | 4.68E-04   | 7.22E-01   | 2.10E-01             |
| NUD      | CARNS1   | 11:67183148-67193078,11:67183148-67193078                                                                                       | 8353 | 1                    | 43667.5  | 0   | 4.81E-04   | NA         | 5.02E-01             |
| CUD      | OR10H3   | 19:15852202-15853153                                                                                                            | 4913 | 1                    | 20173.2  | 0   | 1.12E-04   | 1.34E-01   | 8.52E-01             |
| CUD      | SPTAN1   | 9:131314836-131395944,9:131314836-131395944,9:131314836-131395944                                                               | 4913 | 1                    | 6923.1   | 0   | 1.28E-04   | 9.05E-01   | 3.16E-01             |
| CUD      | G6PC2    | 2:169757749-169766510,2:169757749-169766510                                                                                     | 4913 | 3                    | 67603.6  | 1   | 1.33E-04   | 4.67E-01   | 4.21E-03             |
| CUD      | SMG5     | 1:156219014-156252620                                                                                                           | 4913 | 4                    | 133355.0 | 1   | 1.64E-04   | 7.79E-01   | 7.81E-03             |
| CUD      | MBLAC2   | 5:89754019-89770585                                                                                                             | 4913 | 1                    | 7746.9   | 0   | 2.16E-04   | 7.20E-01   | 1.00E+00             |
| CUD      | BARHL2   | 1:91177578-91182794                                                                                                             | 4913 | 1                    | 6563.9   | 0   | 2.73E-04   | 1.79E-02   | 3.92E-04             |
| CUD      | CALHM1   | 10:105213143-105218648                                                                                                          | 4913 | 1                    | 39441.7  | 0   | 3.05E-04   | 4.05E-01   | 1.51E-03             |

|         |           |                                                                                                                                 |       |    |          |     |          |          |          |
|---------|-----------|---------------------------------------------------------------------------------------------------------------------------------|-------|----|----------|-----|----------|----------|----------|
| CUD     | CYB5R4    | 6:84569369-84670146                                                                                                             | 4913  | 2  | 15553.7  | 0.8 | 3.33E-04 | 7.71E-02 | 8.32E-02 |
| CUD     | PRDM8     | 4:81106423-81125482,4:81118656-81125482                                                                                         | 4913  | 1  | 20623.4  | 0   | 3.61E-04 | NA       | 2.03E-01 |
| CUD     | ARHGAP5   | 14:32546494-32628934,14:32546494-32628934                                                                                       | 4913  | 2  | 34763.1  | 0.2 | 3.81E-04 | 3.28E-01 | 5.14E-04 |
| CUD     | AKAP1     | 17:55162552-55198710                                                                                                            | 4913  | 2  | 47829.6  | 1   | 4.05E-04 | 3.89E-01 | 2.06E-01 |
| CUD     | WDR27     | 6:169857302-170102159,6:169857302-170102159                                                                                     | 4913  | 6  | 71406.7  | 0.2 | 4.54E-04 | 7.07E-01 | 2.86E-01 |
| NMPOUD  | MMP14     | 14:23305792-23316803                                                                                                            | 4305  | 2  | 24610.2  | 0.9 | 1.01E-04 | 2.62E-01 | 2.08E-04 |
| NMPOUD  | UROS      | 10:127477146-127511837                                                                                                          | 4305  | 1  | 10555.8  | 0   | 1.15E-04 | 5.65E-01 | 5.70E-03 |
| NMPOUD  | CCDC15    | 11:124824016-124911385                                                                                                          | 4305  | 1  | 3019.3   | 0   | 1.45E-04 | 2.53E-01 | 6.38E-03 |
| NMPOUD  | HSPB7     | 1:16340522-16345285                                                                                                             | 4305  | 1  | 1869.1   | 0   | 1.77E-04 | 6.23E-01 | 5.74E-01 |
| NMPOUD  | LIPK      | 10:90484300-90512513                                                                                                            | 4305  | 5  | 45557.2  | 0   | 1.86E-04 | 1.00E+00 | 4.40E-03 |
| NMPOUD  | TES       | 7:115863004-115898837,7:115850546-115898837                                                                                     | 4305  | 1  | 7943.2   | 0   | 1.98E-04 | 6.45E-01 | 1.40E-03 |
| NMPOUD  | C19orf28  | 19:3538262-3557571,19:3544196-3557571,19:3538262-3557571                                                                        | 4305  | 4  | 27428.1  | 0.3 | 2.08E-04 | 8.32E-01 | 2.25E-01 |
| NMPOUD  | CENPP     | 9:95087740-95377437                                                                                                             | 4305  | 15 | 40684.9  | 0.1 | 2.48E-04 | 1.03E-01 | 3.39E-01 |
| NMPOUD  | AKAP7     | 6:131456825-131604675,6:131571298-131604675,6:131571298-131604675                                                               | 4305  | 3  | 20094.0  | 0   | 3.19E-04 | 1.25E-01 | 2.65E-01 |
| NMPOUD  | HSPA1B    | 6:31795511-31798031,6_apd_hap1:3110275-3112789,6_cox_hap2:3305093-3307616,6_dbb_hap3:3081098-3083618,6_qbl_hap6:3089162-3091686 | 4305  | 1  | 15323.6  | 0   | 3.86E-04 | 7.05E-01 | 4.35E-04 |
| NMPOUD  | CDC42EP5  | 19:54976209-54984422                                                                                                            | 4305  | 1  | 12493.9  | 0   | 4.38E-04 | 1.61E-01 | 1.35E-04 |
| NMPOUD  | LOC729178 | 6:147162524-147525750                                                                                                           | 4305  | 2  | 19173.3  | 0   | 4.80E-04 | 8.07E-01 | NA       |
| NMPOUD  | CCDC65    | 12:49297892-49315359                                                                                                            | 4305  | 2  | 17629.9  | 0.1 | 4.87E-04 | 7.34E-01 | 4.34E-02 |
| Any SUD | SEMA3G    | 3:52467267-52479043                                                                                                             | 10484 | 2  | 102218.0 | 0.2 | 1.36E-04 | 7.35E-01 | 1.44E-02 |
| Any SUD | TACC1     | 8:38644721-38710546,8:38644721-38710546,8:38585703-38710546                                                                     | 10484 | 1  | 30321.6  | 0   | 1.45E-04 | 8.58E-01 | 2.00E-01 |
| Any SUD | ARHGAP22  | 10:49654078-49813138                                                                                                            | 10484 | 2  | 164483.0 | 0   | 1.60E-04 | 6.97E-01 | 2.30E-03 |
| Any SUD | B3GALT4   | 6_dbb_hap3:4526238-4527924,6_mcf_hap5:4718690-4720376,6_qbl_hap6:4477155-4478841,6:33244916-33246602,6_cox_hap2:4688726-4690412 | 10484 | 1  | 142625.0 | 0   | 1.69E-04 | 1.69E-01 | 6.39E-02 |
| Any SUD | LIPE      | 19:42905665-42931578                                                                                                            | 10484 | 7  | 118616.0 | 0   | 3.31E-04 | 5.97E-01 | 2.33E-01 |
| Any SUD | RBM11     | 21:15588465-15600693                                                                                                            | 10484 | 3  | 149445.0 | 0   | 3.64E-04 | 2.35E-01 | 4.84E-01 |
| Any SUD | LTBP2     | 14:74964885-75079034                                                                                                            | 10484 | 4  | 247146.0 | 1   | 4.93E-04 | 5.48E-01 | 1.70E-03 |

Supplementary table 6 Gene-based association ( $P < 5 \times 10^{-4}$ ) of common variants ( $MAF \geq 0.01$ ) to SUDs in NESARC-III EA.

| Disorder | Gene     | Chr | No.SNPs | Chisq | Pvalue(EA) | Pvalue(AA) | Chisq(Meta) | Pvalue(Meta) |
|----------|----------|-----|---------|-------|------------|------------|-------------|--------------|
| AUD      | OR1M1    | 19  | 4       | 31.9  | 2.07E-04   | 8.99E-01   | 17.2        | 1.78E-03     |
| AUD      | N4BP2L1  | 13  | 4       | 22.9  | 2.40E-04   | 1.14E-01   | 21.0        | 3.15E-04     |
| AUD      | EEF2K    | 16  | 4       | 25.7  | 2.52E-04   | 6.87E-01   | 17.3        | 1.67E-03     |
| AUD      | CRYGD    | 2   | 3       | 22.7  | 2.84E-04   | 7.97E-01   | 16.8        | 2.13E-03     |
| AUD      | ARPC1B   | 7   | 2       | 16.3  | 2.93E-04   | 9.75E-01   | 16.3        | 2.61E-03     |
| AUD      | SCIN     | 7   | 5       | 30.5  | 3.21E-04   | 7.83E-01   | 16.6        | 2.33E-03     |
| AUD      | SMIM17   | 19  | 2       | 17.0  | 3.25E-04   | 3.66E-02   | 22.7        | 1.47E-04     |
| AUD      | ZNF835   | 19  | 2       | 17.0  | 3.25E-04   | 3.66E-02   | 22.7        | 1.47E-04     |
| AUD      | LRRC59   | 17  | 5       | 28.9  | 3.83E-04   | 9.77E-01   | 15.8        | 3.33E-03     |
| NUD      | ULBP3    | 6   | 2       | 20.8  | 3.12E-05   | 2.32E-01   | 23.7        | 9.27E-05     |
| NUD      | ZMYM4    | 1   | 2       | 17.9  | 1.36E-04   | 5.28E-01   | 19.1        | 7.55E-04     |
| NUD      | CCDC150  | 2   | 2       | 17.2  | 1.88E-04   | 9.51E-02   | 21.9        | 2.13E-04     |
| NUD      | EEF2K    | 16  | 4       | 26.6  | 1.91E-04   | 7.99E-01   | 17.6        | 1.50E-03     |
| NUD      | RAB3GAP1 | 2   | 4       | 34.5  | 2.45E-04   | 8.33E-02   | 21.6        | 2.40E-04     |
| NUD      | CCNL1    | 3   | 4       | 33.2  | 2.50E-04   | 5.40E-01   | 17.8        | 1.34E-03     |
| NUD      | MIR575   | 4   | 16      | 63.0  | 3.62E-04   | 9.30E-01   | 16.0        | 3.03E-03     |
| NUD      | DPH6-AS1 | 15  | 6       | 26.0  | 4.87E-04   | 1.86E-01   | 18.6        | 9.32E-04     |
| NUD      | MXRA7    | 17  | 1       | 12.3  | 4.89E-04   | 9.32E-03   | 24.6        | 6.06E-05     |
| CUD      | CCDC150  | 2   | 2       | 18.0  | 1.30E-04   | 1.05E-01   | 22.4        | 1.66E-04     |
| CUD      | FRK      | 6   | 5       | 34.7  | 1.78E-04   | 5.45E-01   | 18.5        | 9.94E-04     |
| CUD      | EXOC2    | 6   | 7       | 34.8  | 2.43E-04   | 6.56E-03   | 26.7        | 2.29E-05     |
| NMPOUD   | SAMSN1   | 21  | 5       | 31.0  | 1.11E-04   | 6.45E-02   | 23.7        | 9.17E-05     |
| NMPOUD   | BRWD1    | 21  | 5       | 40.0  | 1.53E-04   | 3.69E-01   | 19.6        | 6.08E-04     |
| NMPOUD   | PSMG1    | 21  | 5       | 40.0  | 1.53E-04   | 3.10E-01   | 19.9        | 5.18E-04     |
| NMPOUD   | MARCH11  | 5   | 1       | 13.9  | 2.06E-04   | 6.35E-01   | 17.9        | 1.30E-03     |
| NMPOUD   | AKAP7    | 6   | 2       | 16.9  | 2.46E-04   | 2.39E-01   | 19.5        | 6.32E-04     |
| NMPOUD   | SPTLC1   | 9   | 2       | 22.0  | 2.67E-04   | NA         | NA          | NA           |
| NMPOUD   | INTS4    | 11  | 2       | 16.4  | 4.46E-04   | 5.60E-01   | 16.6        | 2.32E-03     |
| Any SUD  | TAS2R19  | 12  | 2       | 26.0  | 6.69E-05   | 5.74E-01   | 20.3        | 4.29E-04     |
| Any SUD  | TAS2R31  | 12  | 2       | 26.0  | 6.69E-05   | 5.74E-01   | 20.3        | 4.29E-04     |
| Any SUD  | EEF2K    | 16  | 4       | 28.2  | 1.12E-04   | 5.67E-01   | 19.3        | 6.79E-04     |
| Any SUD  | CCNL1    | 3   | 4       | 34.2  | 1.98E-04   | 4.04E-01   | 18.9        | 8.33E-04     |
| Any SUD  | CRYGD    | 2   | 3       | 23.0  | 2.60E-04   | 8.03E-01   | 16.9        | 1.98E-03     |
| Any SUD  | TUBGCP5  | 15  | 4       | 27.1  | 2.76E-04   | 4.20E-01   | 18.1        | 1.16E-03     |
| Any SUD  | MXRA7    | 17  | 1       | 13.3  | 2.80E-04   | 1.93E-02   | 24.3        | 7.09E-05     |
| Any SUD  | PRH1     | 12  | 9       | 43.1  | 3.48E-04   | 1.76E-01   | 19.4        | 6.55E-04     |

Supplementary table 7 Genetic Pathway association analysis ( $P < 10^{-3}$ ) in NESARC-III EA.

| Disorder | Set                                                 | No.S NPs | Chisq (Obs) | Pvalue(E A) | Pvalue(A A) | Chisq (Meta) | Pvalue (Meta) |
|----------|-----------------------------------------------------|----------|-------------|-------------|-------------|--------------|---------------|
| AUD      | BIOCARTA EIF PATHWAY                                | 15       | 40.5        | 4.20E-04    | 2.67E-01    | 18.2         | 1.13E-03      |
| AUD      | REACTOME_MRNA_DECAY_BY_3_TO_5_EXORIBONUCLEASE       | 12       | 37.8        | 5.72E-04    | 5.26E-01    | 16.2         | 2.74E-03      |
| NUD      | BIOCARTA_RANMS PATHWAY                              | 14       | 43.8        | 1.28E-04    | 7.21E-01    | 18.6         | 9.51E-04      |
| NUD      | BIOCARTA EIF PATHWAY                                | 15       | 41.9        | 2.55E-04    | 1.70E-01    | 20.1         | 4.79E-04      |
| NUD      | REACTOME_EGFR_DOWNREGULATION                        | 31       | 63.7        | 8.84E-04    | 8.98E-01    | 14.3         | 6.47E-03      |
| CUD      | REACTOME_LIPID_DIGESTION_MOBILIZATION AND TRANSPORT | 242      | 417.5       | 8.32E-05    | 5.57E-01    | 20.0         | 5.09E-04      |
| CUD      | REACTOME_LIPOPROTEIN_METABOLISM                     | 209      | 368.7       | 1.68E-04    | 6.04E-01    | 18.4         | 1.03E-03      |
| CUD      | REACTOME_CHYLOMICRON_MEDIATED_LIPID_TRANSPORT       | 149      | 291.2       | 3.40E-04    | 4.91E-01    | 17.4         | 1.62E-03      |
| Any SUD  | BIOCARTA EIF PATHWAY                                | 15       | 44.2        | 1.16E-04    | 9.57E-02    | 22.8         | 1.38E-04      |



Supplementary table 8 Genetic variants associated with SUDs (single-point Pvalue < 10<sup>-4</sup>) and implicated in gene expression (either eQTL or mQTL)(at least one Pvalue of SMR < 10<sup>-3</sup>) in NESARC-III EA.

| Disorder | Chr | Pos       | SNP        | Gene       | Function      | REF | ALT | Samples | AF    | Pvalue (EA) | Pvalue SMR mQTL_Brain | Pvalue SMR mQTL_LBC | Pvalue SMR eQTL_CAGE |
|----------|-----|-----------|------------|------------|---------------|-----|-----|---------|-------|-------------|-----------------------|---------------------|----------------------|
| AUD      | 2   | 208994045 | rs2242073  | CRYGC      | Intron        | T   | G   | 8446    | 0.168 | 8.16E-05    | 3.78E-04              | 2.24E-04            | NA                   |
| AUD      | 7   | 98957880  | rs740160   | ARPC1A     | Intron        | C   | T   | 8446    | 0.043 | 8.41E-05    | 3.00E-04              | NA                  | NA                   |
| AUD      | 6   | 116325142 | rs3756772  | FRK        | Nonsynonymous | C   | T   | 8446    | 0.425 | 9.28E-05    | 1.01E-04              | 4.41E-04            | NA                   |
| AUD      | 7   | 99118801  | rs11761528 | ZKSCAN5    | Intron        | C   | T   | 8446    | 0.079 | 9.62E-05    | 1.05E-04              | NA                  | 1.33E-03             |
| NUD      | 16  | 22237273  | rs17841292 | EEF2K      | Nonsynonymous | C   | G   | 8353    | 0.073 | 3.96E-05    | NA                    | 4.48E-05            | NA                   |
| NUD      | 6   | 116325142 | rs3756772  | FRK        | Nonsynonymous | C   | T   | 8353    | 0.425 | 7.30E-05    | 8.02E-05              | 3.76E-04            | NA                   |
| CUD      | 6   | 116325142 | rs3756772  | FRK        | Nonsynonymous | C   | T   | 4913    | 0.420 | 1.41E-05    | 1.61E-05              | 1.33E-04            | NA                   |
| CUD      | 6   | 32814942  | rs1057149  | TAP1       | Nonsynonymous | C   | T   | 4913    | 0.025 | 1.99E-05    | 1.23E-04              | 2.06E-05            | NA                   |
| CUD      | 6   | 625673    | rs2294669  | EXOC2      | Intron        | C   | G   | 4913    | 0.715 | 4.51E-05    | 1.29E-04              | 1.00E-04            | NA                   |
| CUD      | 15  | 58862825  | rs71478677 | Intergenic | Intergenic    | C   | T   | 4913    | 0.015 | 4.66E-05    | NA                    | 2.20E-04            | NA                   |
| CUD      | 7   | 25687828  | rs1859041  | Intergenic | Intergenic    | A   | G   | 4913    | 0.583 | 6.57E-05    | NA                    | 1.26E-04            | NA                   |
| CUD      | 15  | 58865388  | rs74016912 | Intergenic | Intergenic    | C   | A   | 4913    | 0.015 | 9.44E-05    | NA                    | 1.50E-04            | NA                   |
| CUD      | 15  | 58850734  | rs2414593  | LIPC       | Intron        | T   | C   | 4913    | 0.984 | 9.55E-05    | NA                    | 5.11E-04            | NA                   |
| NMPOUD   | 16  | 79682751  | rs1424233  | Intergenic | Intergenic    | T   | C   | 4305    | 0.515 | 1.89E-05    | NA                    | 2.21E-05            | NA                   |
| NMPOUD   | 16  | 53769677  | rs6499640  | FTO        | Intron        | G   | A   | 4305    | 0.608 | 2.58E-05    | NA                    | NA                  | 5.74E-04             |
| NMPOUD   | 9   | 94821861  | rs12237598 | SPTLC1     | Intron        | A   | G   | 4305    | 0.019 | 4.96E-05    | 4.05E-04              | NA                  | NA                   |
| Any SUD  | 12  | 11183108  | rs12318612 | TAS2R31    | Nonsynonymous | G   | C   | 10484   | 0.269 | 8.78E-06    | 1.09E-04              | NA                  | NA                   |
| Any SUD  | 15  | 22816713  | rs8035524  | Intergenic | Intergenic    | A   | C   | 10484   | 0.351 | 3.56E-05    | 4.89E-04              | 3.58E-05            | NA                   |
| Any SUD  | 6   | 116325142 | rs3756772  | FRK        | Nonsynonymous | C   | T   | 10484   | 0.427 | 4.58E-05    | 5.09E-05              | 2.78E-04            | NA                   |
| Any SUD  | 2   | 208994045 | rs2242073  | CRYGC      | Intron        | T   | G   | 10484   | 0.167 | 7.12E-05    | 3.44E-04              | 2.01E-04            | NA                   |

Supplementary table 9 Colocalization analysis using the LocusFocus tool in NESARC-III EA (Simple Sum Pvalue < 10<sup>-3</sup>). Genetic variants associated with SUDs (single-point Pvalue < 5x10<sup>-5</sup>) and implicated in gene expression in GTEx.

| Disorder | Gene     | Tissue                              | Simple Sum Pvalue |
|----------|----------|-------------------------------------|-------------------|
| AUD      | ARHGAP15 | Brain Substantia nigra              | 5.50E-05          |
| AUD      | KCNH7    | Lung                                | 7.59E-05          |
| NUD      | PCDH9    | Brain Spinal cord cervical c-1      | 2.45E-09          |
| NUD      | PCDH9    | Brain Caudate basal ganglia         | 2.51E-08          |
| NUD      | PCDH9    | Skin Not Sun Exposed Suprapubic     | 5.37E-06          |
| NUD      | ZMYM4    | Muscle Skeletal                     | 4.27E-04          |
| CUD      | FRK      | Brain Spinal cord cervical c-1      | 3.80E-04          |
| CUD      | FRK      | Pancreas                            | 3.98E-05          |
| CUD      | FRK      | Colon Transverse                    | 2.04E-04          |
| CUD      | FRK      | Adipose Visceral Omentum            | 2.88E-05          |
| CUD      | FRK      | Brain Hippocampus                   | 8.51E-05          |
| CUD      | FRK      | Small Intestine Terminal Ileum      | 7.76E-05          |
| NMPOUD   | FTO      | Esophagus Gastroesophageal Junction | 1.41E-04          |
| NMPOUD   | SPTLC1   | Skin Sun Exposed Lower leg          | 3.31E-04          |
| NMPOUD   | SPTLC1   | Cells Transformed fibroblasts       | 3.31E-04          |
| NMPOUD   | SPTLC1   | Adipose Visceral Omentum            | 3.31E-04          |
| NMPOUD   | SPTLC1   | Adipose Subcutaneous                | 3.31E-04          |
| NMPOUD   | SPTLC1   | Esophagus Mucosa                    | 3.31E-04          |
| NMPOUD   | SPTLC1   | Skin Not Sun Exposed Suprapubic     | 3.31E-04          |
| NMPOUD   | SPTLC1   | Nerve Tibial                        | 3.31E-04          |
| Any SUD  | FRK      | Brain Spinal cord cervical c-1      | 1.70E-04          |
| Any SUD  | FRK      | Pancreas                            | 1.74E-04          |
| Any SUD  | FRK      | Colon Transverse                    | 1.58E-04          |
| Any SUD  | FRK      | Adipose Visceral Omentum            | 2.04E-04          |
| Any SUD  | FRK      | Small Intestine Terminal Ileum      | 1.55E-04          |
| Any SUD  | FRK      | Pituitary                           | 3.09E-04          |

Supplementary table 10 Joint analysis of SNPs in four SUDs accounting for comorbidity in NESARC-III, via MTAG ( $P < 5 \times 10^{-5}$ ), .

| Disorder | SNP        | Gene     | Function | Chr | Pos       | A1 | A2 | Z     | N    | Frq  | mtag z | Pvalue (MTAG) |
|----------|------------|----------|----------|-----|-----------|----|----|-------|------|------|--------|---------------|
| AUD      | rs35789697 | ARHGAP15 | Intron   | 2   | 144248718 | A  | G  | -4.15 | 8446 | 0.37 | -4.33  | 1.50E-05      |
| AUD      | rs35942385 | ARHGAP15 | Intron   | 2   | 144208523 | T  | G  | -3.97 | 8446 | 0.37 | -4.13  | 3.63E-05      |
| NUD      | rs35789697 | ARHGAP15 | Intron   | 2   | 144248718 | A  | G  | -3.50 | 8353 | 0.37 | -4.29  | 1.79E-05      |
| NUD      | rs35942385 | ARHGAP15 | Intron   | 2   | 144208523 | T  | G  | -3.43 | 8353 | 0.37 | -4.10  | 4.20E-05      |
| CUD      | rs35789697 | ARHGAP15 | Intron   | 2   | 144248718 | A  | G  | -2.05 | 4913 | 0.38 | -4.30  | 1.70E-05      |
| CUD      | rs35942385 | ARHGAP15 | Intron   | 2   | 144208523 | T  | G  | -1.98 | 4913 | 0.38 | -4.10  | 4.05E-05      |
| NMPOUD   | rs35789697 | ARHGAP15 | Intron   | 2   | 144248718 | A  | G  | -2.98 | 4305 | 0.38 | -4.31  | 1.64E-05      |
| NMPOUD   | rs35942385 | ARHGAP15 | Intron   | 2   | 144208523 | T  | G  | -2.70 | 4305 | 0.38 | -4.11  | 3.94E-05      |

Supplementary table 11 Multivariate analysis of four SUDs via TATES ( $P < 10^{-4}$ ) in NESARC-III.

| SNP        | Gene       | Function      | n phen | Pvalue-AUD | Pvalue - NUD | Pvalue - CUD | Pvalue - NMPOUD | Pvalue-Multivariate |
|------------|------------|---------------|--------|------------|--------------|--------------|-----------------|---------------------|
| rs4574131  | KCNH7      | Intron        | 4      | 6.39E-06   | 1.98E-02     | 2.49E-01     | 1.54E-03        | 2.50E-05            |
| rs10930073 | KCNH7      | Intron        | 4      | 8.83E-06   | 3.04E-02     | 3.02E-01     | 3.26E-03        | 3.45E-05            |
| rs12476629 | Intergenic | Intergenic    | 4      | 8.88E-06   | 2.13E-02     | 2.85E-01     | 2.85E-03        | 3.47E-05            |
| rs12465289 | KCNH7      | Intron        | 4      | 1.05E-05   | 2.28E-02     | 2.67E-01     | 2.21E-03        | 4.11E-05            |
| rs16847467 | Intergenic | Intergenic    | 4      | 1.15E-05   | 2.53E-02     | 2.89E-01     | 2.60E-03        | 4.47E-05            |
| rs4888599  | Intergenic | Intergenic    | 4      | 3.45E-03   | 1.26E-05     | 2.01E-04     | 8.71E-04        | 4.90E-05            |
| rs10180917 | KCNH7      | Intron        | 4      | 1.36E-05   | 3.30E-02     | 3.31E-01     | 2.79E-03        | 5.30E-05            |
| rs3756772  | FRK        | Nonsynonymous | 4      | 9.28E-05   | 7.30E-05     | 1.41E-05     | 5.76E-01        | 5.49E-05            |
| rs10171918 | KCNH7      | Intron        | 4      | 1.56E-05   | 2.68E-02     | 3.28E-01     | 4.54E-03        | 6.09E-05            |
| rs12476040 | KCNH7      | Intron        | 4      | 1.59E-05   | 3.15E-02     | 3.41E-01     | 3.09E-03        | 6.19E-05            |
| rs10169170 | KCNH7      | Intron        | 4      | 1.64E-05   | 2.77E-02     | 3.38E-01     | 2.00E-03        | 6.41E-05            |
| rs3912909  | KCNH7      | Intron        | 4      | 1.71E-05   | 3.51E-02     | 3.11E-01     | 2.65E-03        | 6.67E-05            |
| rs1424233  | Intergenic | Intergenic    | 4      | 3.65E-02   | 4.25E-02     | 3.10E-01     | 1.89E-05        | 7.36E-05            |
| rs11898091 | KCNH7      | Intron        | 4      | 1.93E-05   | 3.46E-02     | 3.12E-01     | 3.12E-03        | 7.54E-05            |
| rs1057149  | TAP1       | Nonsynonymous | 4      | 2.30E-02   | 1.64E-01     | 1.99E-05     | 8.11E-02        | 7.79E-05            |
| rs41550019 | TAP1       | Nonsynonymous | 4      | 2.29E-02   | 1.66E-01     | 2.02E-05     | 8.19E-02        | 7.90E-05            |
| rs4667768  | KCNH7      | Intron        | 4      | 2.12E-05   | 3.36E-02     | 3.66E-01     | 2.49E-03        | 8.27E-05            |
| rs4933836  | NRG3       | Intron        | 4      | 5.49E-02   | 3.77E-03     | 2.14E-05     | 6.95E-01        | 8.37E-05            |
| rs3912911  | KCNH7      | Intron        | 4      | 2.25E-05   | 3.12E-02     | 3.00E-01     | 3.16E-03        | 8.78E-05            |
| rs12611890 | KCNH7      | Intron        | 4      | 2.34E-05   | 4.23E-02     | 3.55E-01     | 2.59E-03        | 9.14E-05            |
| rs1389092  | KCNH7      | Intron        | 4      | 2.34E-05   | 4.21E-02     | 2.88E-01     | 4.66E-03        | 9.15E-05            |
| rs3912910  | KCNH7      | Intron        | 4      | 2.36E-05   | 3.67E-02     | 3.35E-01     | 2.74E-03        | 9.21E-05            |
| rs9646728  | KCNH7      | Intron        | 4      | 2.48E-05   | 5.00E-02     | 3.10E-01     | 4.20E-03        | 9.69E-05            |
| rs4667759  | KCNH7      | Intron        | 4      | 2.51E-05   | 3.43E-02     | 3.58E-01     | 3.61E-03        | 9.81E-05            |
| rs7330064  | PCDH9      | Intron        | 4      | 4.23E-03   | 2.55E-05     | 2.56E-02     | 2.29E-01        | 9.95E-05            |

Supplementary table 12 Replication signals for SNPs/genes reported in Table 1 for NESARC-III in other large GWAS for alcohol/nicotine/drug related phenotypes (P<0.05).

| Disorder | Chr | Pos       | SNP        | Genea      | Ref | Alt | Pvalue (NESARC-III) | Trait and Pvalue in large GWAS (same SNP or SNPs in the same gene) |
|----------|-----|-----------|------------|------------|-----|-----|---------------------|--------------------------------------------------------------------|
| AUD      | 2   | 163678535 | rs4574131  | KCNH7      | T   | G   | 6.39E-06            | AUDIT; P=4.62E-02 (Sanchez-Roige, S. 2019)                         |
| AUD      | 2   | 163689483 | rs10930073 | KCNH7      | C   | T   | 8.83E-06            | Drink per week; P=1.17E-04 (Liu, M. 2019)                          |
| AUD      | 2   | 163703739 | rs12476629 | Intergenic | T   | G   | 8.88E-06            | AUDIT; P=4.90E-02 (Sanchez-Roige, S. 2019)                         |
| AUD      | 2   | 163682494 | rs12465289 | KCNH7      | G   | T   | 1.05E-05            | Drink per week; P=1.35E-04 (Liu, M. 2019)                          |
| AUD      | 2   | 163696863 | rs16847467 | Intergenic | A   | G   | 1.15E-05            | Drink per week; P=9.89E-05 (Liu, M. 2019)                          |
| AUD      | 2   | 163691715 | rs10180917 | KCNH7      | T   | A   | 1.36E-05            | Drink per week; P=1.30E-04 (Liu, M. 2019)                          |
| AUD      | 2   | 163692689 | rs10171918 | KCNH7      | G   | A   | 1.56E-05            | Drink per week; P=1.32E-04 (Liu, M. 2019)                          |
| AUD      | 2   | 163687672 | rs12476040 | KCNH7      | T   | C   | 1.59E-05            | Drink per week; P=1.18E-04 (Liu, M. 2019)                          |
| AUD      | 2   | 163692347 | rs10169170 | KCNH7      | G   | A   | 1.64E-05            | Drink per week; P=1.45E-04 (Liu, M. 2019)                          |
| AUD      | 2   | 163669642 | rs3912909  | KCNH7      | G   | T   | 1.71E-05            | Drink per week; P=1.38E-04 (Liu, M. 2019)                          |
| AUD      | 2   | 163690219 | rs11898091 | KCNH7      | C   | T   | 1.93E-05            | Drink per week; P=1.16E-04 (Liu, M. 2019)                          |
| AUD      | 2   | 163694878 | rs4667768  | KCNH7      | C   | G   | 2.12E-05            | Drink per week; P=1.12E-04 (Liu, M. 2019)                          |
| AUD      | 2   | 163670203 | rs3912911  | KCNH7      | C   | T   | 2.25E-05            | Drink per week; P=1.92E-04 (Liu, M. 2019)                          |
| AUD      | 2   | 163681163 | rs12611890 | KCNH7      | G   | A   | 2.34E-05            | Drink per week; P=1.28E-04 (Liu, M. 2019)                          |
| AUD      | 2   | 163689167 | rs1389092  | KCNH7      | G   | T   | 2.34E-05            | Drink per week; P=1.28E-04 (Liu, M. 2019)                          |
| AUD      | 2   | 163669750 | rs3912910  | KCNH7      | G   | A   | 2.36E-05            | Drink per week; P=1.99E-04 (Liu, M. 2019)                          |
| AUD      | 2   | 163684757 | rs9646728  | KCNH7      | A   | G   | 2.48E-05            | Drink per week; P=1.12E-04 (Liu, M. 2019)                          |
| AUD      | 2   | 163680351 | rs4667759  | KCNH7      | C   | T   | 2.51E-05            | Drink per week; P=1.39E-04 (Liu, M. 2019)                          |
| AUD      | 2   | 144248718 | rs35789697 | ARHGAP15   | G   | A   | 3.25E-05            | Alcohol Dependence; P=1.18E-02 (Walters, R.K 2018)                 |
| AUD      | 2   | 163666127 | rs7601793  | KCNH7      | G   | A   | 3.25E-05            | Drink per week; P=1.30E-04 (Liu, M. 2019)                          |
| AUD      | 2   | 163694024 | rs10221628 | KCNH7      | C   | G   | 3.70E-05            | Drink per week; P=1.15E-04 (Liu, M. 2019)                          |
| NUD      | 6   | 150390149 | rs72501734 | ULBP3      | G   | C   | 1.10E-05            | rs150836130: Cigarettes Per Day; P=1.87E-02 (Liu, M. 2019)         |
| NUD      | 16  | 77154226  | rs4888599  | Intergenic | C   | G   | 1.26E-05            | intergenic                                                         |
| NUD      | 13  | 67697374  | rs7330064  | PCDH9      | C   | G   | 2.55E-05            | rs9571688: Cigarettes Per Day; P=1.42E-06 (Liu, M. 2019)           |
| NUD      | 1   | 35847032  | rs34924462 | ZMYM4      | G   | A   | 2.59E-05            | rs554746273: Cigarettes Per Day; P=5.98E-03 (Liu, M. 2019)         |
| NUD      | 12  | 10383316  | rs10772246 | Intergenic | A   | G   | 2.62E-05            | intergenic                                                         |
| NUD      | 10  | 84098252  | rs7918769  | NRG3       | T   | A   | 3.34E-05            | Cigarettes Per Day; P=3.46E-02 (Liu, M. 2019)                      |
| NUD      | 10  | 84098752  | rs3897738  | NRG3       | C   | T   | 3.58E-05            | Cigarettes Per Day; P=3.11E-02 (Liu, M. 2019)                      |
| NUD      | 10  | 84094771  | rs3862550  | NRG3       | T   | C   | 3.66E-05            | Cigarettes Per Day; P=3.03E-02 (Liu, M. 2019)                      |
| NUD      | 16  | 22237118  | rs9935059  | EEF2K      | A   | G   | 3.69E-05            | rs528623954: Cigarettes Per Day; P=8.69E-03 (Liu, M. 2019)         |

|         |    |           |             |              |   |   |          |                                                                |
|---------|----|-----------|-------------|--------------|---|---|----------|----------------------------------------------------------------|
| NUD     | 16 | 22237273  | rs17841292  | EEF2K        | C | G | 3.96E-05 | rs528623954: Cigarettes Per Day; P=8.69E-03 (Liu, M. 2019)     |
| NUD     | 10 | 84110564  | rs7917348   | NRG3         | A | G | 4.38E-05 | Cigarettes Per Day; P=4.10E-02 (Liu, M. 2019)                  |
| NUD     | 10 | 84087761  | rs7476649   | NRG3         | C | T | 4.84E-05 | rs79723357; Cigarettes Per Day; P=2.69E-05 (Liu, M. 2019)      |
| NUD     | 10 | 84113099  | rs11193893  | NRG3         | A | G | 4.87E-05 | Cigarettes Per Day; P=4.16E-02 (Liu, M. 2019)                  |
| NUD     | 10 | 84117730  | rs12248513  | NRG3         | G | A | 4.99E-05 | Cigarettes Per Day; P=3.64E-02 (Liu, M. 2019)                  |
| CUD     | 6  | 116325142 | rs3756772   | FRK          | C | T | 1.41E-05 | rs17077492: CUD; P=6.41E-03 (Demontis, D. 2019)                |
| CUD     | 6  | 32814942  | rs1057149   | TAP1         | C | T | 1.99E-05 | rs55874331: AUD; P=2.04E-02 (Kranzler, H.R 2019)               |
| CUD     | 6  | 32816772  | rs41550019  | TAP1         | C | A | 2.02E-05 | rs55874331: AUD; P=2.04E-02 (Kranzler, H.R 2019)               |
| CUD     | 10 | 84137873  | rs4933836   | NRG3         | C | T | 2.14E-05 | rs34940289: CUD; P=5.58E-03 (Demontis, D. 2019)                |
| CUD     | 10 | 84168912  | rs10787129  | NRG3         | T | A | 2.93E-05 | rs34940289: CUD; P=5.58E-03 (Demontis, D. 2019)                |
| CUD     | 6  | 625673    | rs2294669   | EXOC2        | C | G | 4.51E-05 | Smoking Initiation; P=3.61E-02 (Liu, M. 2019)                  |
| CUD     | 15 | 58862825  | rs71478677  | Intergenic   | C | T | 4.66E-05 | intergenic                                                     |
| NMPOUD  | 16 | 79682751  | rs1424233   | Intergenic   | T | C | 1.89E-05 | intergenic                                                     |
| NMPOUD  | 16 | 53769677  | rs6499640   | FTO          | G | A | 2.58E-05 | AUD; P=3.20E-03 (Kranzler, H.R 2019)                           |
| NMPOUD  | 9  | 94821861  | rs12237598  | SPTLC1       | A | G | 4.96E-05 | rs147565708: OUD; P=1.25E-02 (Zhou, H. 2020)                   |
| Any SUD | 16 | 77154226  | rs4888599   | Intergenic   | C | G | 6.74E-06 | intergenic                                                     |
| Any SUD | 12 | 11183108  | rs12318612  | TAS2R31      | G | C | 8.78E-06 | Cigarettes Per Day; P=3.20E-02 (Liu, M. 2019)                  |
| Any SUD | 15 | 36139024  | rs2646782   | LOC100507466 | A | G | 1.19E-05 | Cigarettes Per Day; P=3.76E-02 (Liu, M. 2019)                  |
| Any SUD | 19 | 58861808  | rs145144275 | A1BG         | A | G | 2.86E-05 | Smoking Cessation; P=2.97E-03 (Liu, M. 2019)                   |
| Any SUD | 7  | 115335567 | rs78431260  | Intergenic   | C | T | 3.07E-05 | Intergenic                                                     |
| Any SUD | 15 | 22816713  | rs8035524   | Intergenic   | A | C | 3.56E-05 | Intergenic                                                     |
| Any SUD | 7  | 115336270 | rs74960260  | Intergenic   | T | C | 3.87E-05 | Intergenic                                                     |
| Any SUD | 6  | 116325142 | rs3756772   | FRK          | C | T | 4.58E-05 | rs76882893: Alcohol dependence; P=2.11E-02 (Walters, R.K 2018) |

Supplementary Fig. 1 Study design of NESARC-III SUD GWAS and analysis of cross-transmission of four SUDs.

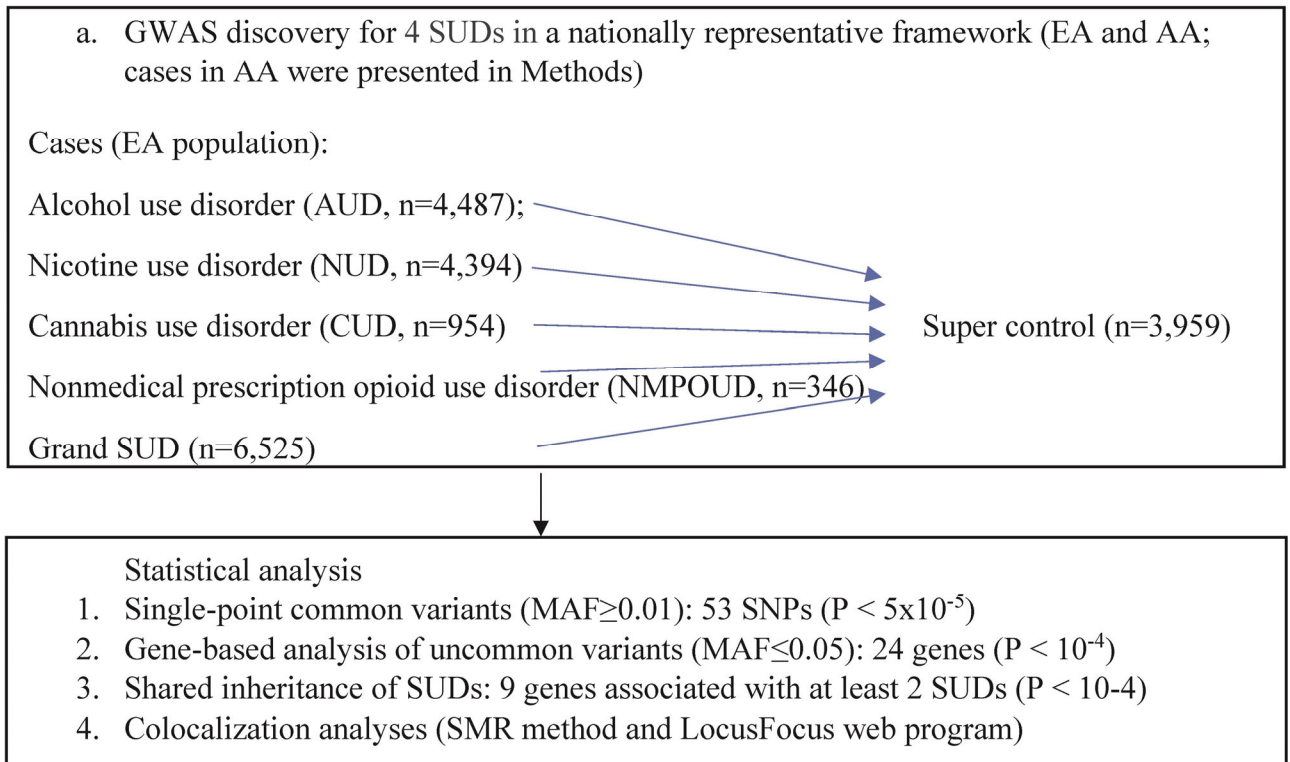

- b. Prediction of severe, moderate and mild SUD by 4 SUD polygenic scores (PGS)
- c. Phenotypic correlation and genetic correlation.

Supplementary Fig. 2 Multidimensional scaling (MDS) plots with the top two MDS scores for cases and controls in EA and AA from NESARC-III.

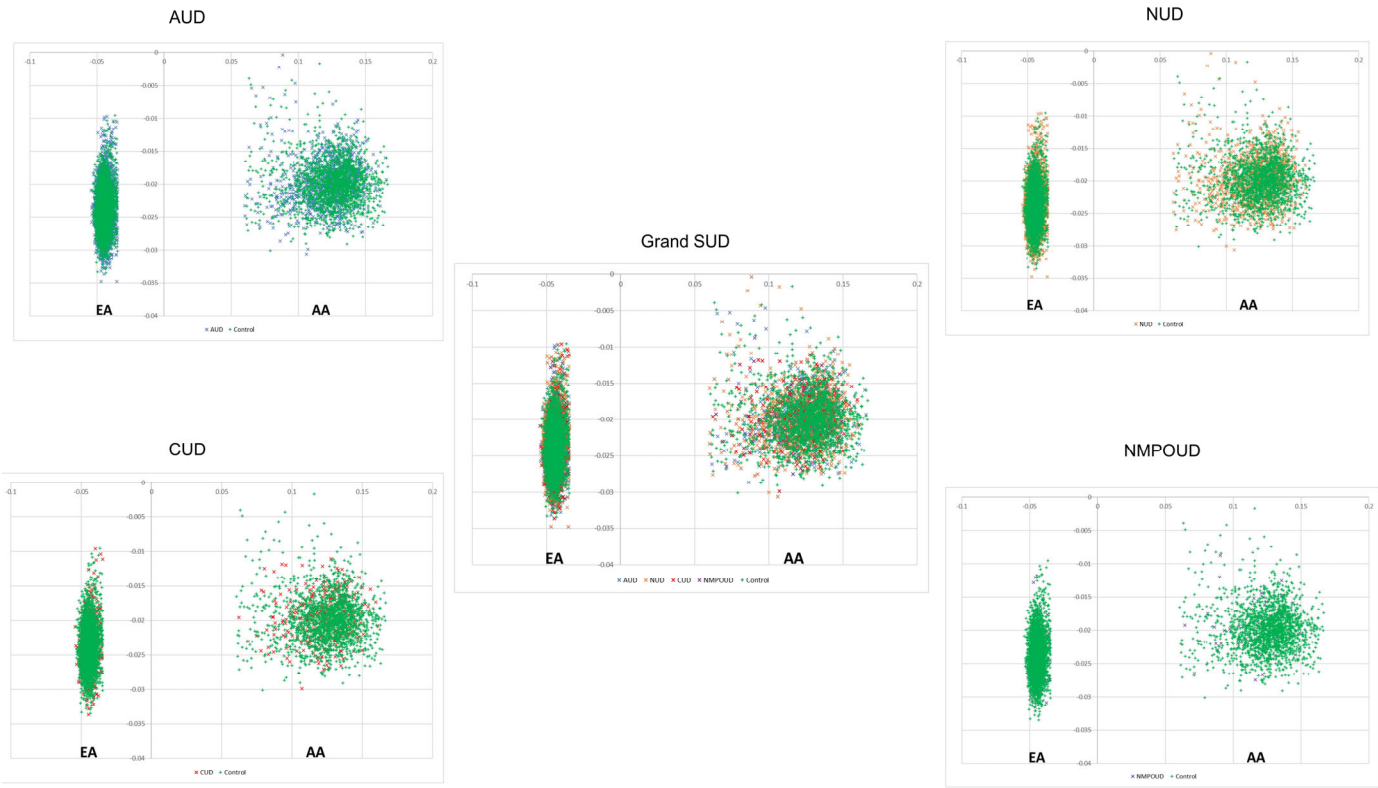



Supplementary Fig. 3 Quantile–quantile (QQ) plots for GWAS of four SUDs and Grand analysis of 4 SUDs GWAS in NESARC-III EA. Lambda values were AUD:1.02, NUD:1.03, CUD:1.03, NMPOUD:1.01, and any SUD:1.01.

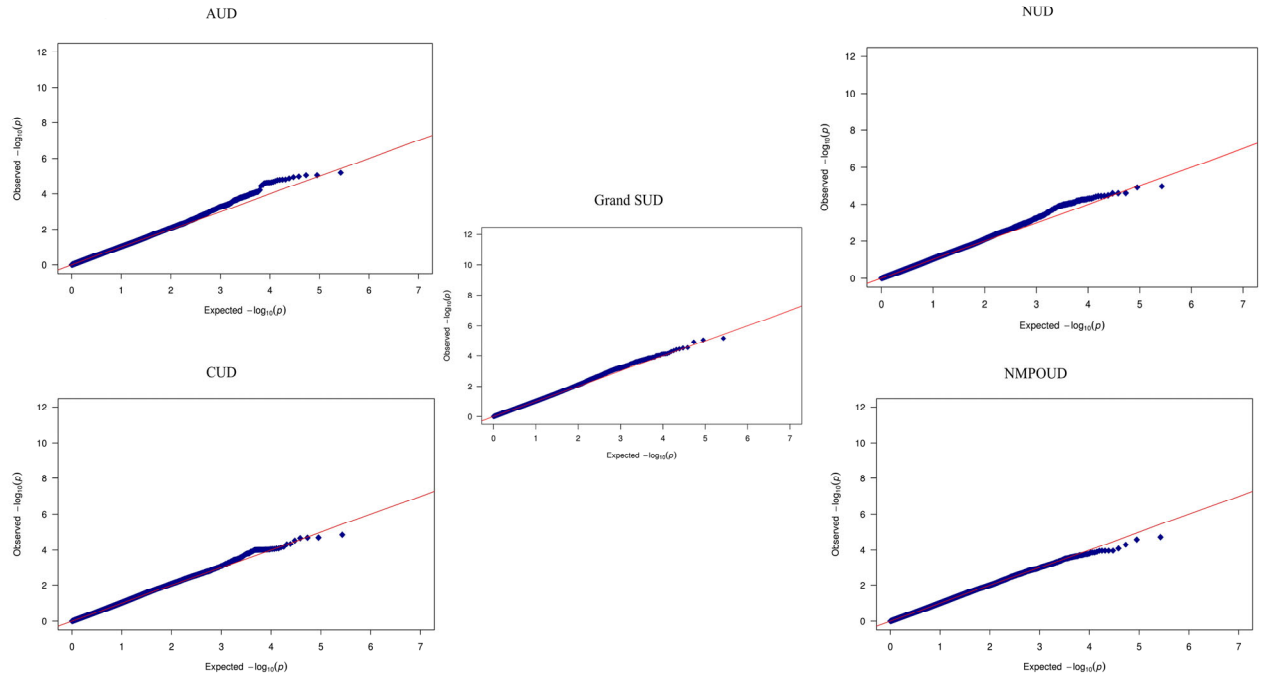

Supplementary Fig. 4 Manhattan plots of exome-wide association for four substance use disorders in EA in the NESARC-III sample.  $-\log_{10}$  of the score test P value for 134,238 directly genotyped common variants ( $MAF \geq 0.01$ ). The blue line is  $P < 10^{-5}$ .

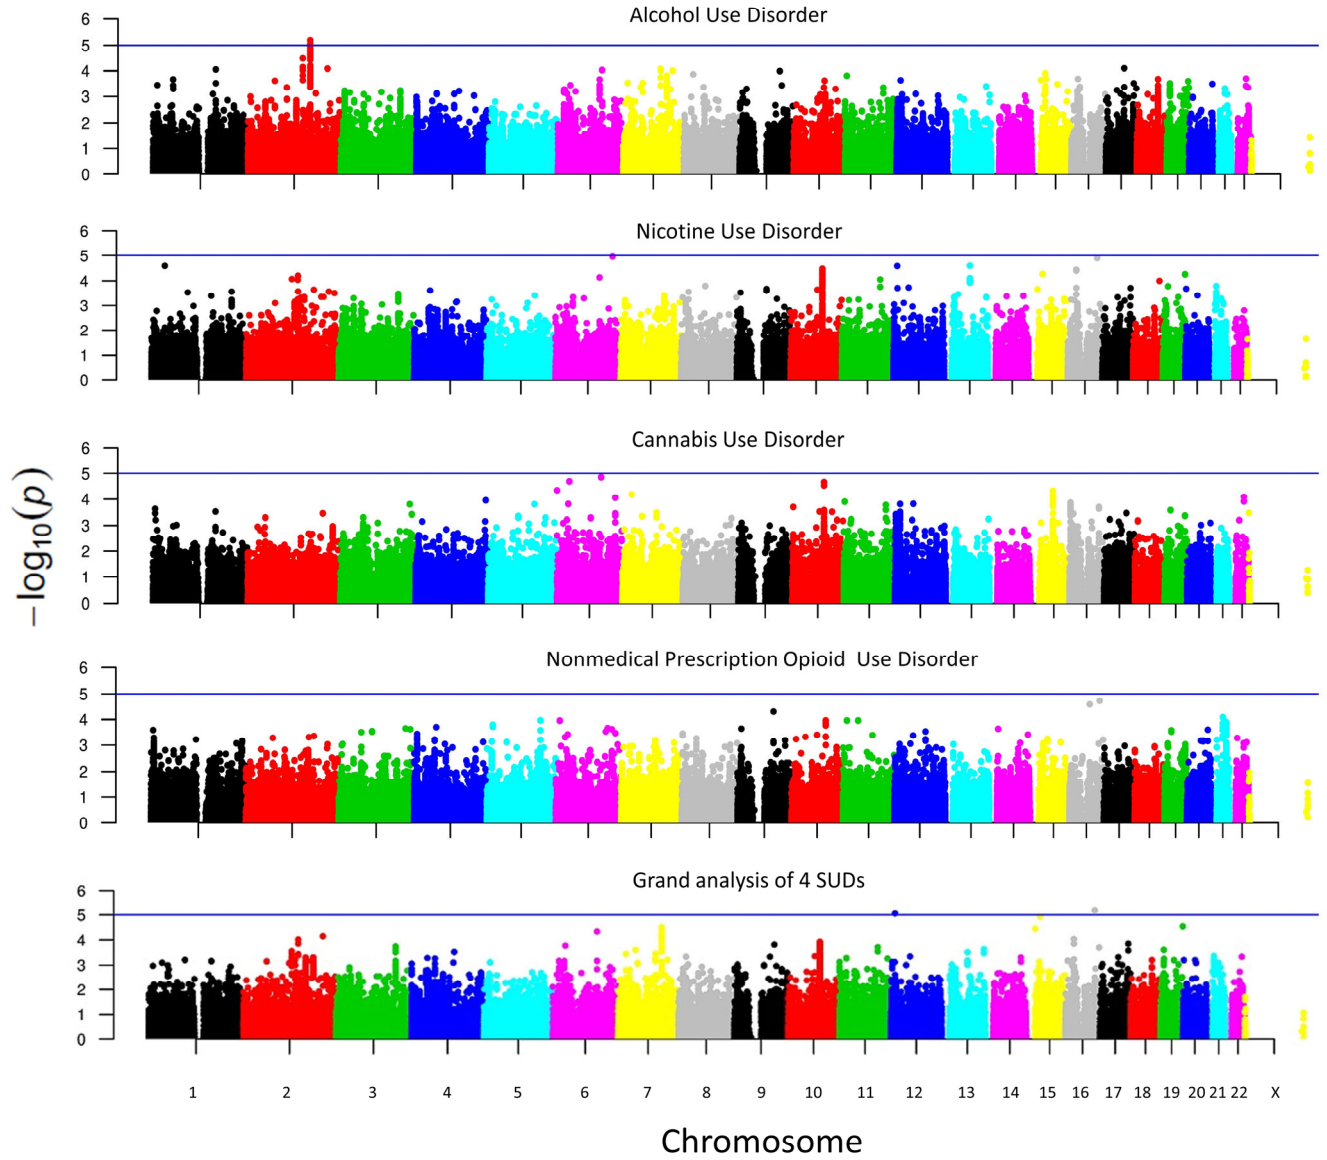

Supplementary Fig. 5 Manhattan plot (Gene-based test for uncommon variants) of gene-based (exome-wide) association of four SUDs in NESARC-III EA.  $-\log_{10}$  of the score test P value for gene-based test with uncommon variants ( $MAF \leq 0.05$ ), with genome wide significant  $P < 5 \times 10^{-8}$  highlighted in red and  $P < 1 \times 10^{-5}$  in blue.

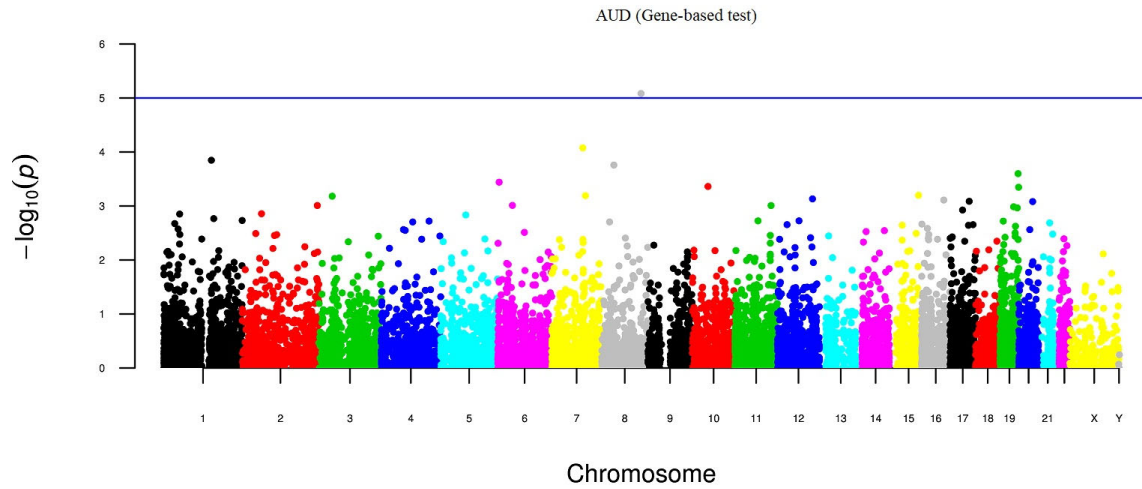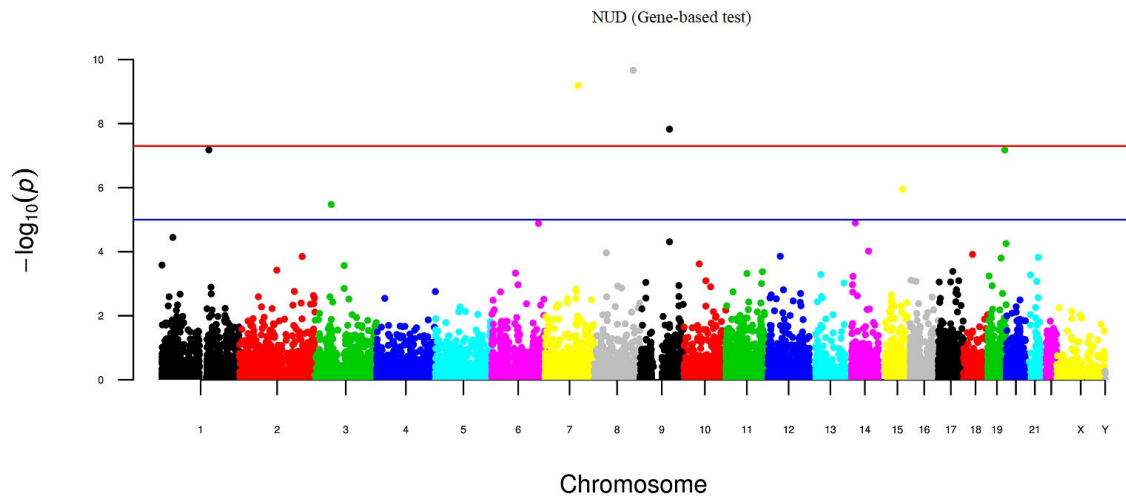

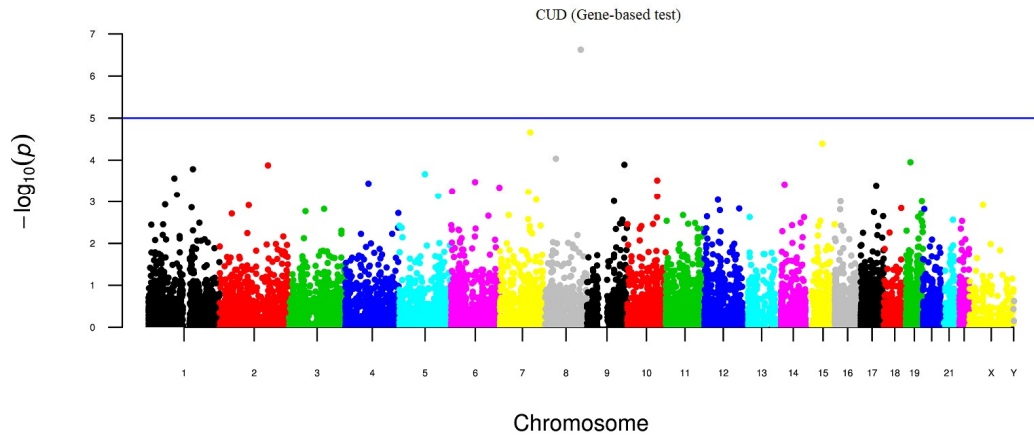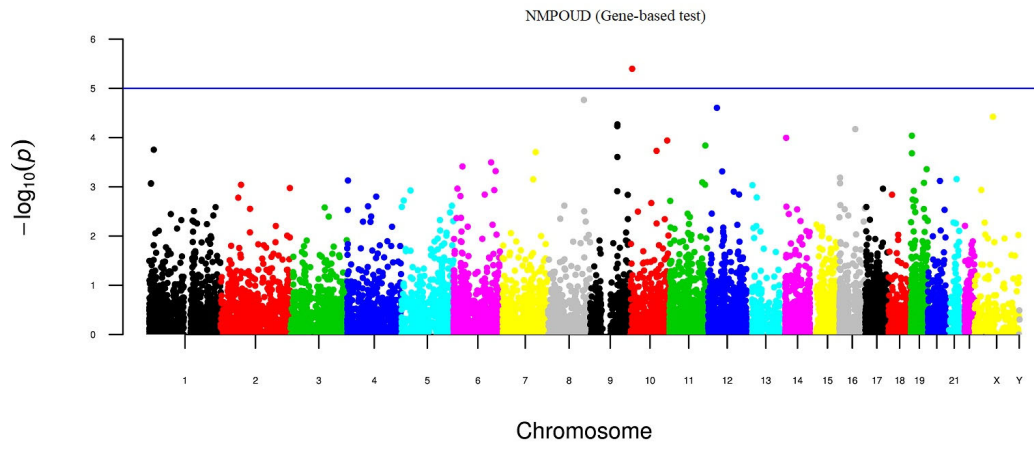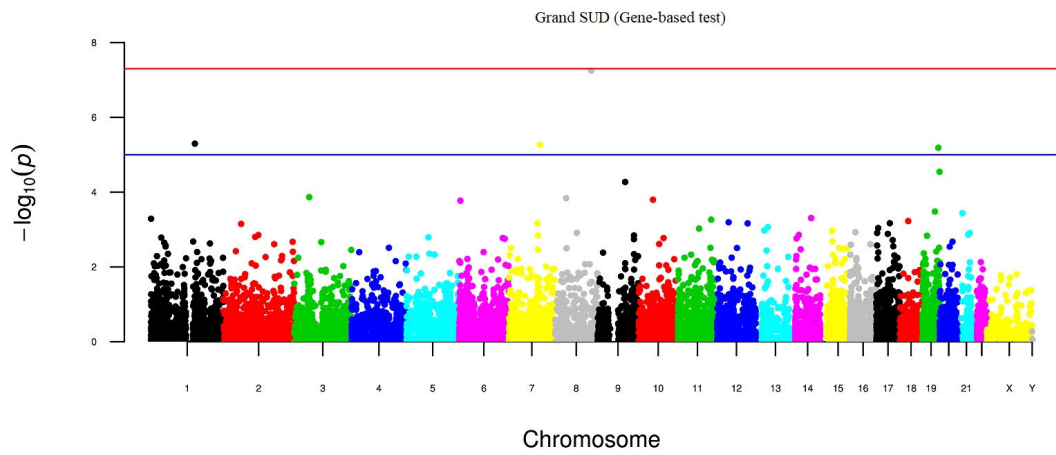

Supplementary Fig. 6 Genes pleiotropically affecting multiple SUDs in NESARC-III identified from single-point analysis ( $P < 5 \times 10^{-5}$ ), and gene-based association of uncommon variants ( $P < 10^{-4}$ ), Multi-trait analysis controlling for comorbidity via MTAG ( $P < 5 \times 10^{-5}$ ), multivariate test on 4 SUD via TATES ( $P < 10^{-4}$ ).

|                 |   |   |   |   |   |   |
|-----------------|---|---|---|---|---|---|
| <i>NRG3</i>     |   | ■ | ■ |   |   | ■ |
| <i>FRK</i>      |   |   | ■ |   | ■ | ■ |
| <i>FER1L6</i>   | ■ | ■ | ■ | ■ | ■ |   |
| <i>OMD</i>      |   | ■ |   | ■ | ■ |   |
| <i>TUFT1</i>    |   | ■ |   |   | ■ |   |
| <i>KCNH7</i>    |   |   |   |   |   | ■ |
| <i>PCDH9</i>    |   |   |   |   |   | ■ |
| <i>TAP1</i>     |   |   |   |   |   | ■ |
| <i>ARHGAP15</i> | ■ | ■ | ■ | ■ |   |   |

AUD    NUD    CUD    NMPOUD    Grand SUD    4SUD

|   |                                           |
|---|-------------------------------------------|
| ■ | single-point                              |
| ■ | Gene-based (uncommon variants)            |
| ■ | Single-point; Multi-trait analysis (MTAG) |
| ■ | Multivariate test: 4SUD (TATES program)   |

Supplementary Fig. 7 Clinical (phenotypic) correlation vs. genetic correlation across pairs of SUDs in NESARC-III (n=12,505 EA samples). Genetic correlations were calculated as pairwise correlations between polygenic scores (PGS) of 2 SUDs, where PGS scores were formulated on the basis of external large GWAS (except for CUD for which we used NESARC-III CUD GWAS) summary statistics. Phenotypic correlations were derived as the phi correlation coefficient ( $r_\phi$ ) between a pair of SUDs.

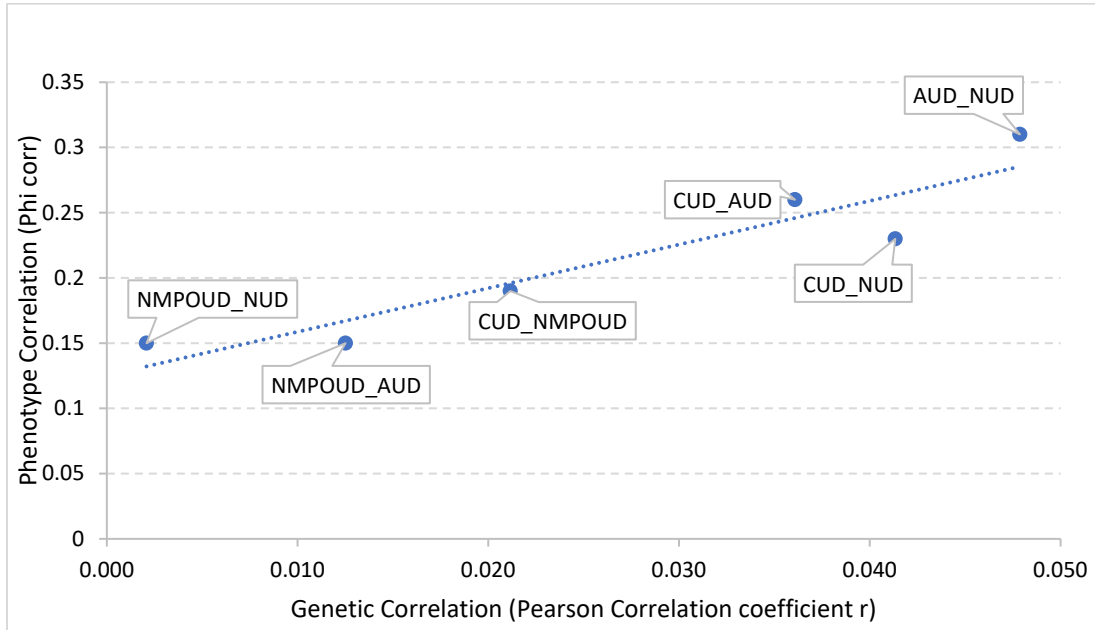

Supplement: NIHMS1755754-supplement-1755754_Sup_material.pdf [file NIHMS1755754-supplement-1755754_Sup_material.pdf]
